# Supplementary material for: Synthesis and Antiproliferative Activity of Novel Dehydroabietic Acid-Chalcone Hybrids
Source: MDPI journal article supplement (doi:10.3390/molecules27113623), 2022-06-05
Supplement: s1 [file s1]

## SUPPORTING INFORMATION

### Synthesis and Antiproliferative Activity of Novel Dehydroabietic Acid- Chalcone hybrids

**Sophia Grigoropoulou <sup>1</sup>, Dimitra Manou <sup>2</sup>, Antonia I. Antoniou <sup>1</sup>, Artemis Tsirogianni <sup>1</sup>, Carlo Siciliano <sup>3</sup>, Achilleas D. Theocharis <sup>2,\*</sup> and Constantinos M. Athanassopoulos <sup>1,\*</sup>**

<sup>1</sup> Synthetic Organic Chemistry Laboratory, Department of Chemistry, University of Patras, GR-26504 Patras, Greece; grigorsophia@hotmail.com (S.G.); tonadoniou@upatras.gr (A.I.A.); kath@chemistry.upatras.gr (C.M.A.)

<sup>2</sup> Biochemistry, Biochemical Analysis & Matrix Pathobiology Research Group, Laboratory of Biochemistry, Department of Chemistry, University of Patras, GR-26504 Patras, Greece; dimitramanou@outlook.com (D.M.); atheoch@upatras.gr (A.D.T.)

<sup>3</sup> Department of Pharmacy, Health and Nutritional Sciences, Edificio Polifunzionale, I-87036 Arcavacata di Rende (CS), Italy; carlo.siciliano@unical.it (C.S)

\* Correspondence: kath@chemistry.upatras.gr; Tel.: +30-2610-997909 and atheoch@upatras.gr; Tel.: +30-2610-996029

### Copies of NMR spectra

## Table of contents

|                                                               |    |
|---------------------------------------------------------------|----|
| Figure S1. $^1\text{H}$ -NMR spectrum of compound 31.....     | 4  |
| Figure S2. $^{13}\text{C}$ -NMR spectrum of compound 31.....  | 4  |
| Figure S3. $^1\text{H}$ -NMR spectrum of compound 32.....     | 5  |
| Figure S4. $^{13}\text{C}$ -NMR spectrum of compound 32.....  | 5  |
| Figure S5. $^1\text{H}$ -NMR spectrum of compound 33.....     | 6  |
| Figure S6. $^{13}\text{C}$ -NMR spectrum of compound 33.....  | 6  |
| Figure S7. APT-NMR spectrum of compound 33. ....              | 7  |
| Figure S8. $^1\text{H}$ -NMR spectrum of compound 34.....     | 7  |
| Figure S9. $^{13}\text{C}$ -NMR spectrum of compound 34.....  | 8  |
| Figure S10. $^1\text{H}$ -NMR spectrum of compound 35.....    | 8  |
| Figure S11. $^{13}\text{C}$ -NMR spectrum of compound 35..... | 9  |
| Figure S12. $^1\text{H}$ -NMR spectrum of compound 36.....    | 9  |
| Figure S13. $^{13}\text{C}$ -NMR spectrum of compound 36..... | 10 |
| Figure S14. $^1\text{H}$ -NMR spectrum of compound 37.....    | 10 |
| Figure S15. $^{13}\text{C}$ -NMR spectrum of compound 37..... | 11 |
| Figure S16. APT-NMR spectrum of compound 37. ....             | 11 |
| Figure S17. $^1\text{H}$ -NMR spectrum of compound 38.....    | 12 |
| Figure S18. $^{13}\text{C}$ -NMR spectrum of compound 38..... | 12 |
| Figure S19. APT-NMR spectrum of compound 38. ....             | 13 |
| Figure S20. $^1\text{H}$ -NMR spectrum of compound 39.....    | 13 |
| Figure S21. $^{13}\text{C}$ -NMR spectrum of compound 39..... | 14 |
| Figure S22. $^1\text{H}$ -NMR spectrum of compound 40.....    | 14 |
| Figure S23. $^{13}\text{C}$ -NMR spectrum of compound 40..... | 15 |
| Figure S24. $^1\text{H}$ -NMR spectrum of compound 41.....    | 15 |
| Figure S25. $^{13}\text{C}$ -NMR spectrum of compound 41..... | 16 |
| Figure S26. APT-NMR spectrum of compound 41. ....             | 16 |
| Figure S27. $^1\text{H}$ -NMR spectrum of compound 42.....    | 17 |
| Figure S28. $^{13}\text{C}$ -NMR spectrum of compound 42..... | 17 |
| Figure S29. $^1\text{H}$ -NMR spectrum of compound 43.....    | 18 |

|                                                               |    |
|---------------------------------------------------------------|----|
| Figure S30. $^{13}\text{C}$ -NMR spectrum of compound 43..... | 18 |
| Figure S31. APT-NMR spectrum of compound 43. ....             | 19 |
| Figure S32. $^1\text{H}$ -NMR spectrum of compound 44.....    | 19 |
| Figure S33. $^{13}\text{C}$ -NMR spectrum of compound 44..... | 20 |
| Figure S34. APT-NMR spectrum of compound 44. ....             | 20 |
| Figure S35. $^1\text{H}$ -NMR spectrum of compound 45.....    | 21 |
| Figure S36. $^{13}\text{C}$ -NMR spectrum of compound 45..... | 21 |
| Figure S37. $^1\text{H}$ -NMR spectrum of compound 46.....    | 22 |
| Figure S38. $^{13}\text{C}$ -NMR spectrum of compound 46..... | 22 |
| Figure S39. $^1\text{H}$ -NMR spectrum of compound 47.....    | 23 |
| Figure S40. $^{13}\text{C}$ -NMR spectrum of compound 47..... | 23 |
| Figure S40. APT-NMR spectrum of compound 47. ....             | 24 |
| Figure S42. $^1\text{H}$ -NMR spectrum of compound 48.....    | 24 |
| Figure S43. $^{13}\text{C}$ -NMR spectrum of compound 48..... | 25 |
| Figure S44. $^1\text{H}$ -NMR spectrum of compound 49.....    | 25 |
| Figure S45. $^{13}\text{C}$ -NMR spectrum of compound 49..... | 26 |
| Figure S46. $^1\text{H}$ -NMR spectrum of compound 50.....    | 26 |
| Figure S47. $^{13}\text{C}$ -NMR spectrum of compound 50..... | 27 |
| Figure S48. $^1\text{H}$ -NMR spectrum of compound 51.....    | 27 |
| Figure S49. $^{13}\text{C}$ -NMR spectrum of compound 51..... | 28 |
| Figure S50. APT-NMR spectrum of compound 51. ....             | 28 |
| Figure S51 $^1\text{H}$ -NMR spectrum of compound 52.....     | 29 |
| Figure S52. $^{13}\text{C}$ -NMR spectrum of compound 52..... | 29 |
| Figure S53. $^1\text{H}$ -NMR spectrum of compound 53.....    | 30 |
| Figure S54. $^{13}\text{C}$ -NMR spectrum of compound 53..... | 30 |

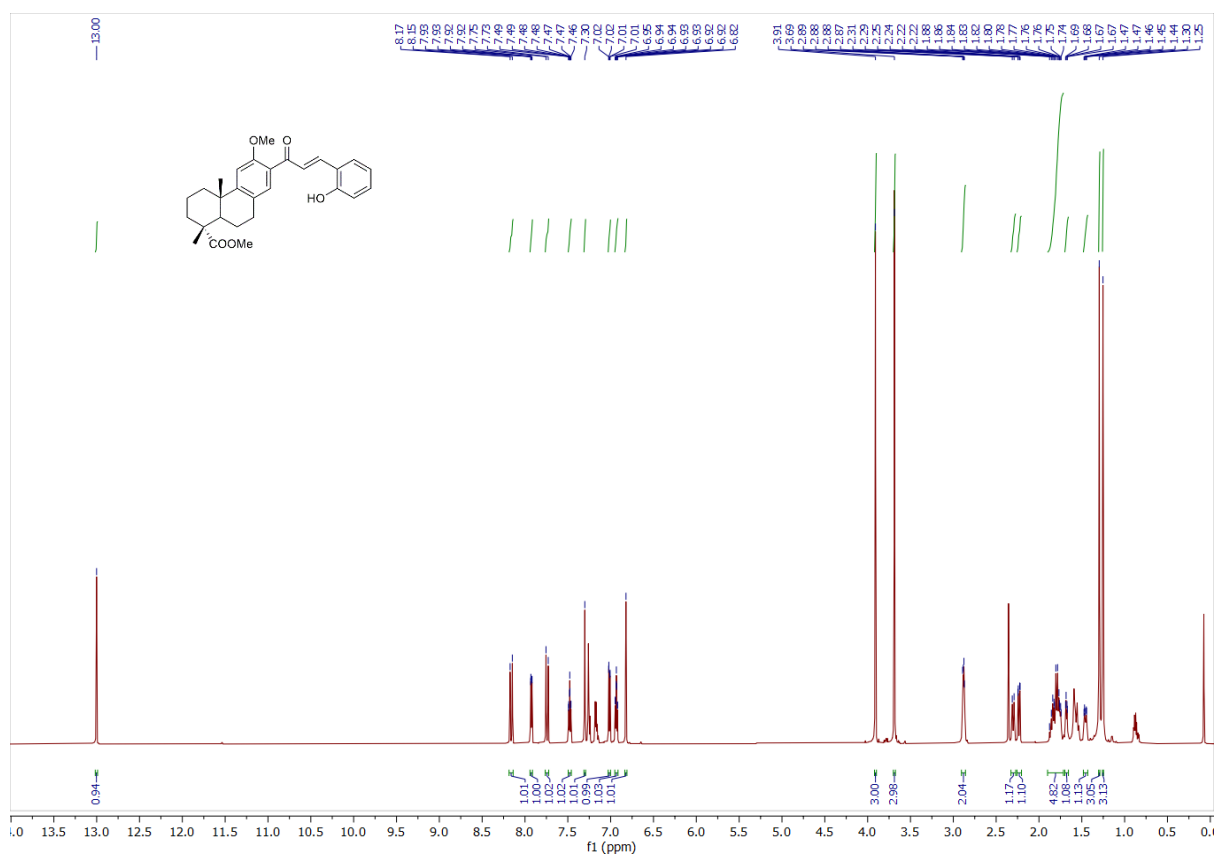

Figure S1. <sup>1</sup>H-NMR spectrum of compound 31.

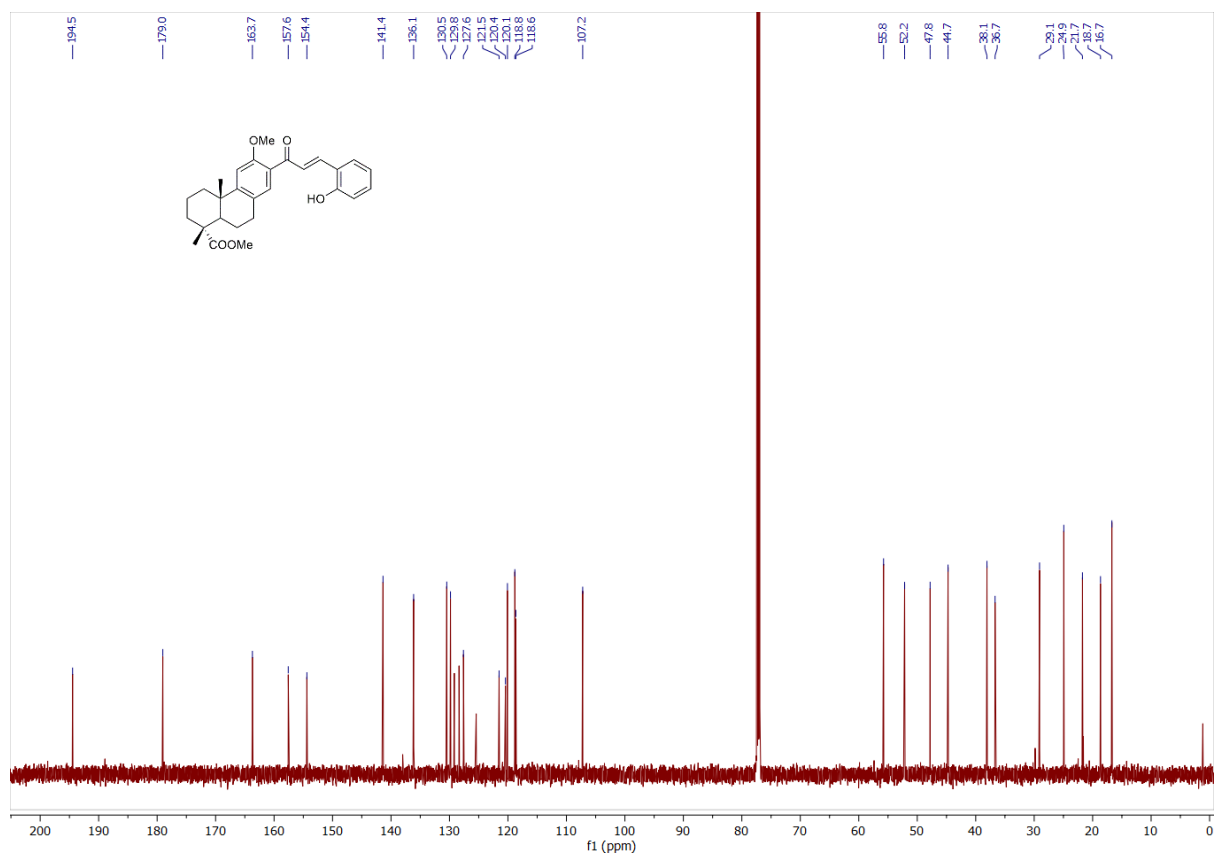

Figure S2. <sup>13</sup>C-NMR spectrum of compound 31.

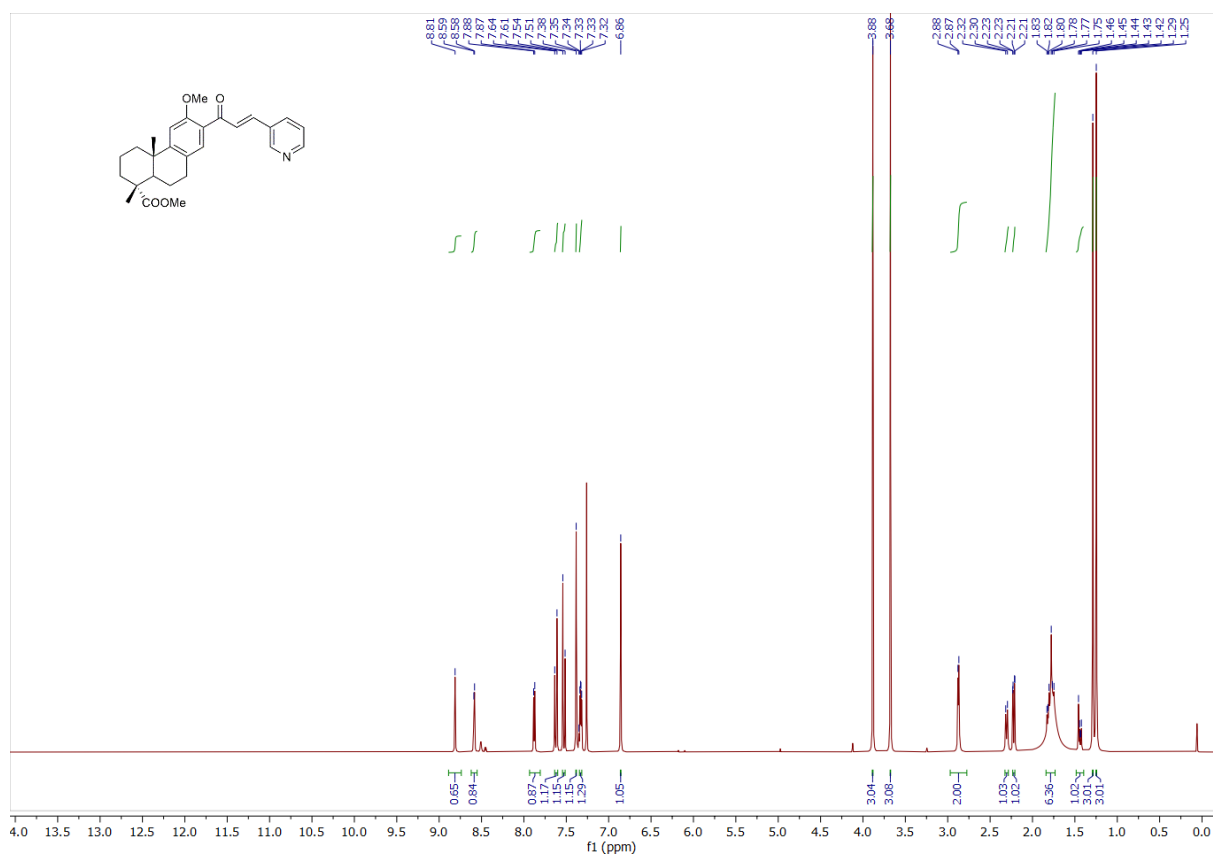

Figure S3. <sup>1</sup>H-NMR spectrum of compound 32.

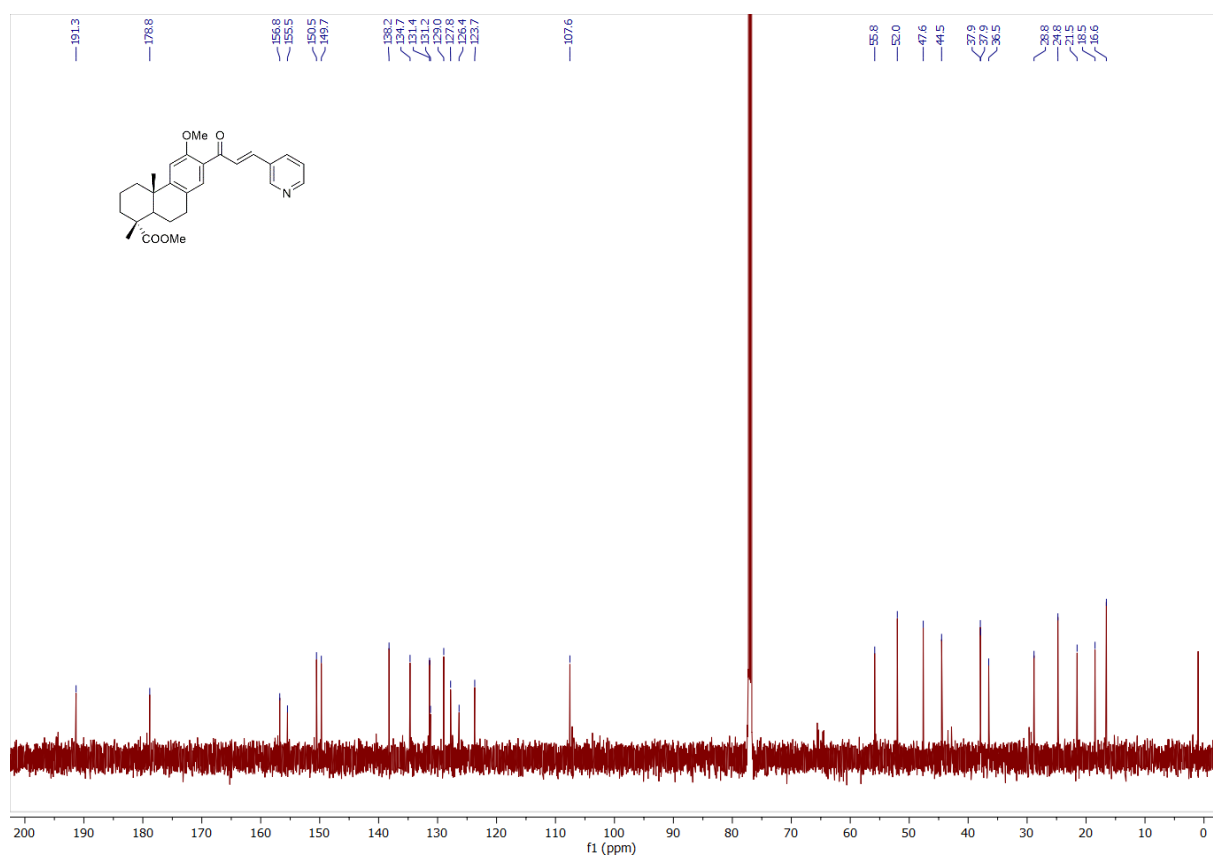

Figure S4. <sup>13</sup>C-NMR spectrum of compound 32.

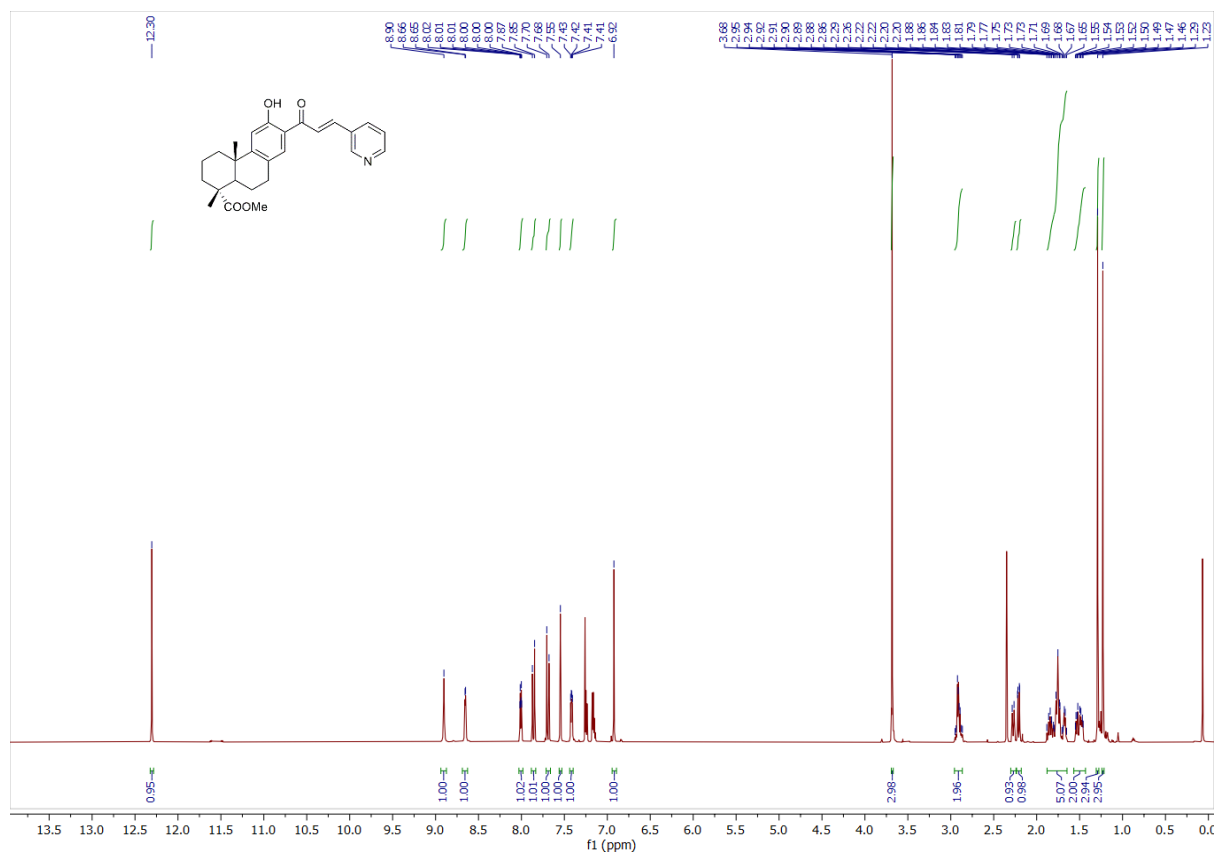

Figure S5. <sup>1</sup>H-NMR spectrum of compound 33.

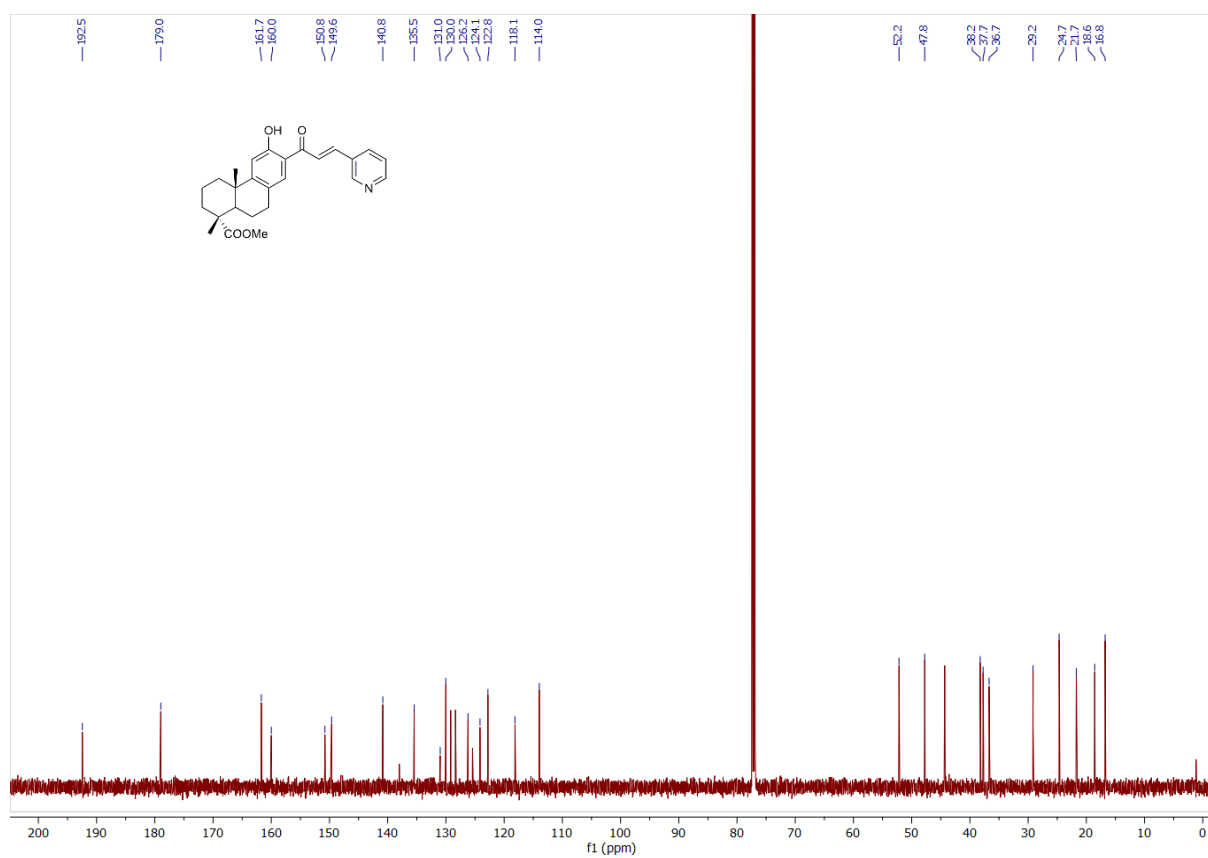

Figure S6. <sup>13</sup>C-NMR spectrum of compound 33.

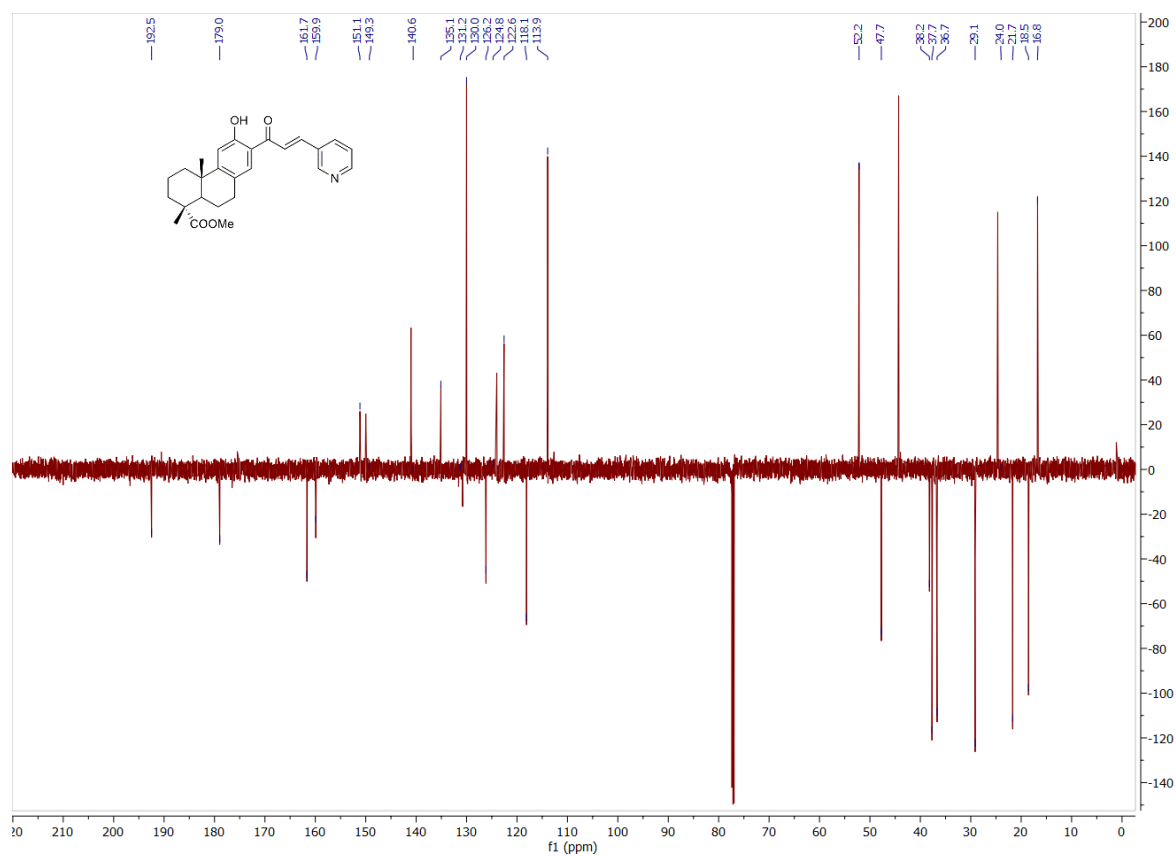

Figure S7. APT-NMR spectrum of compound 33.

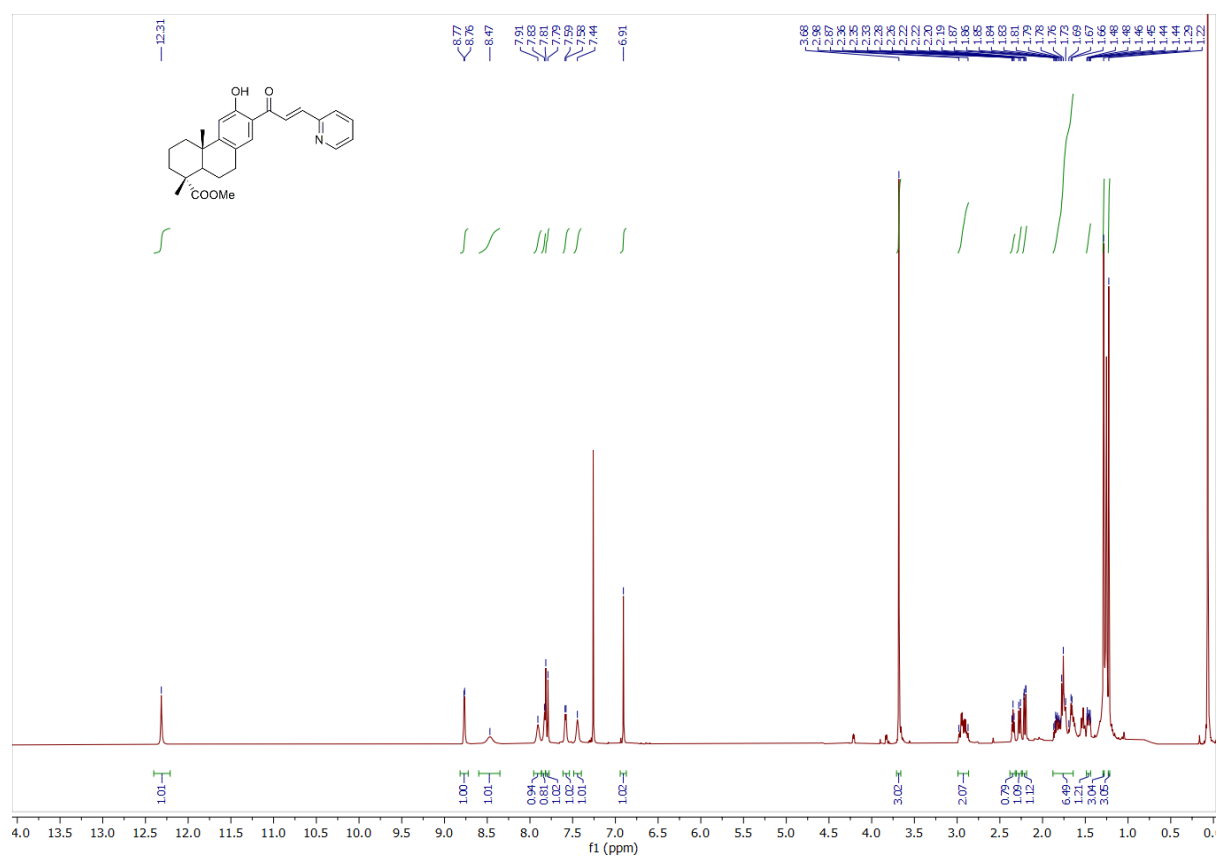

Figure S8.  $^1\text{H}$ -NMR spectrum of compound 34.

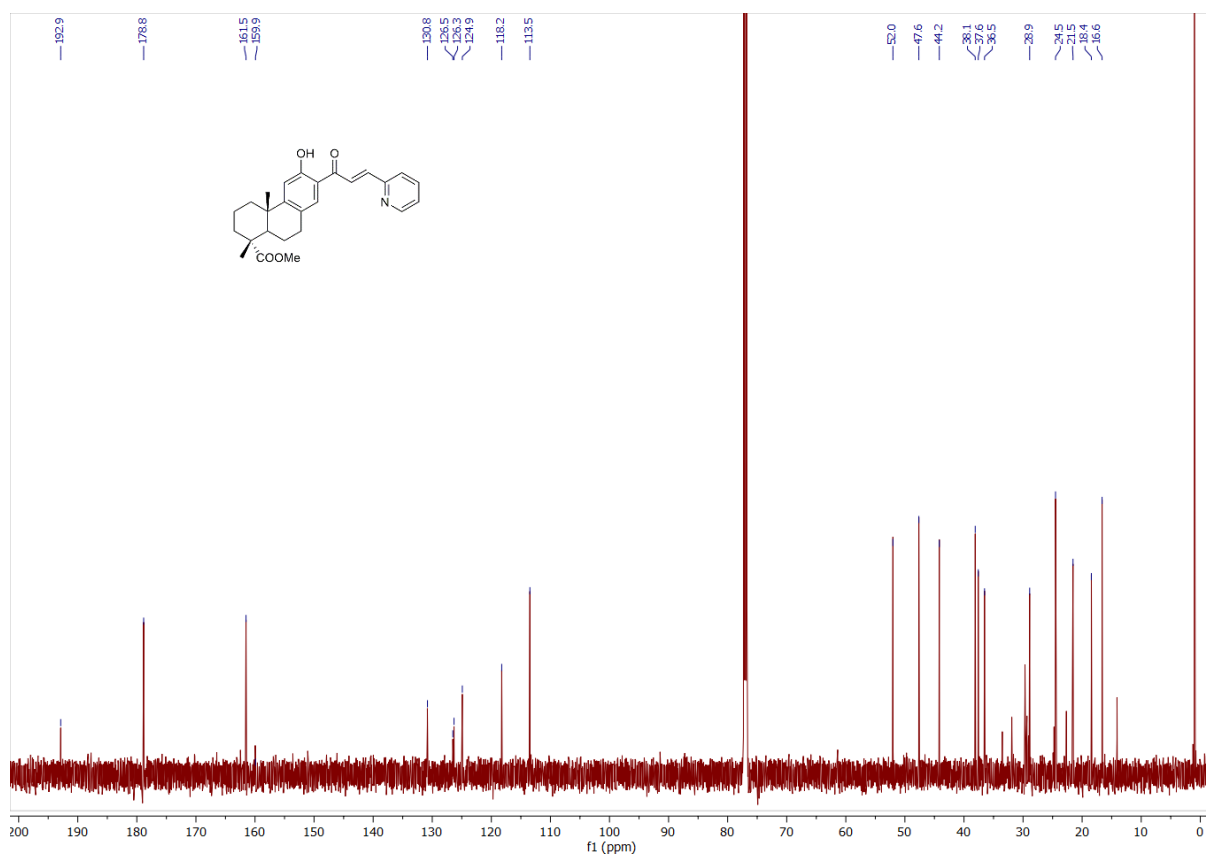

Figure S9. <sup>13</sup>C-NMR spectrum of compound 34.

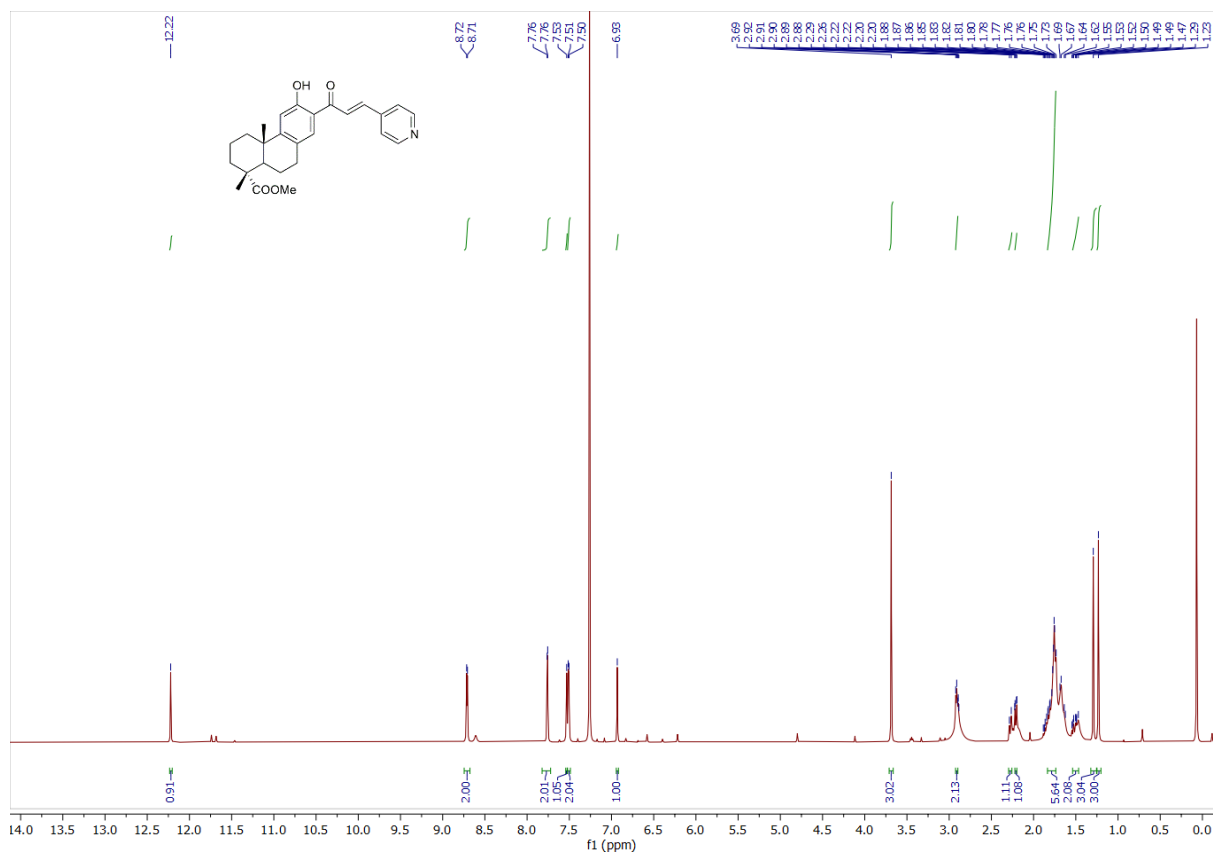

Figure S10. <sup>1</sup>H-NMR spectrum of compound 35.



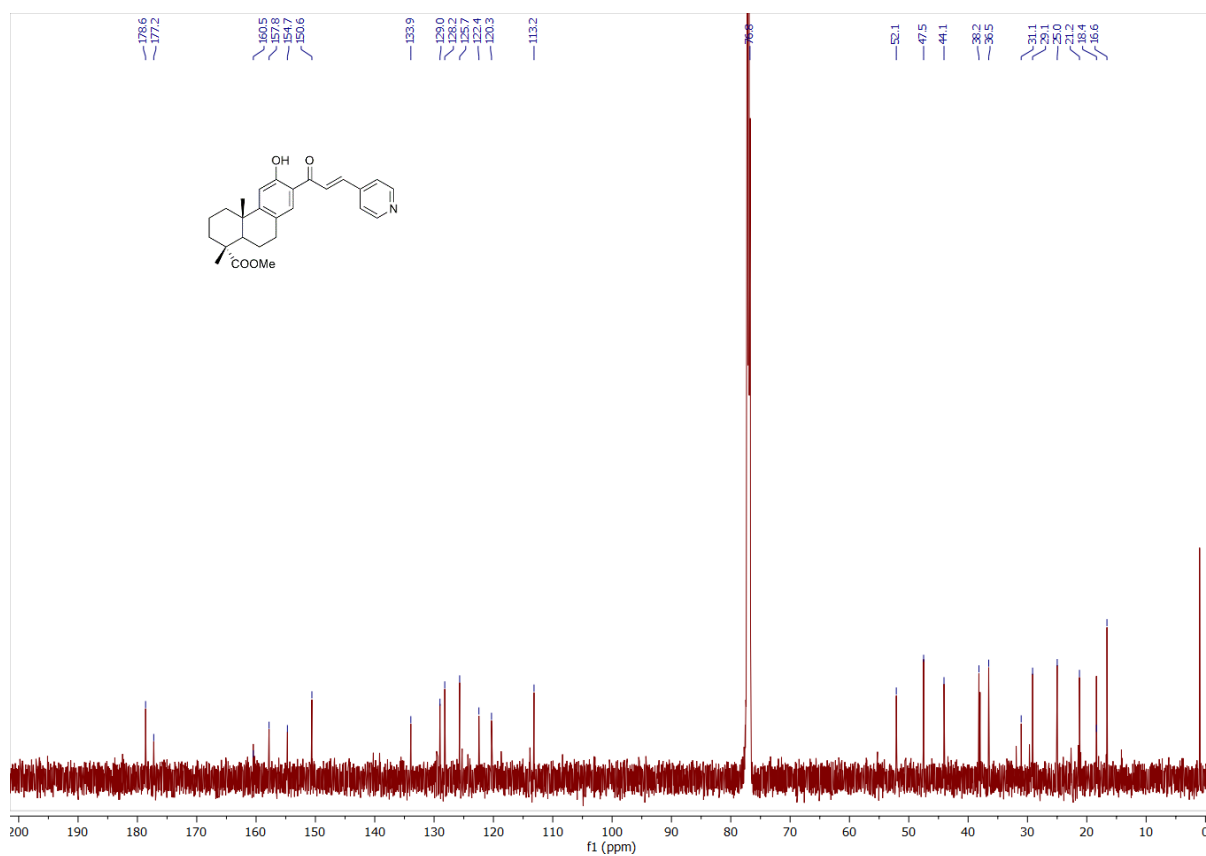

Figure S11. <sup>13</sup>C-NMR spectrum of compound 35.

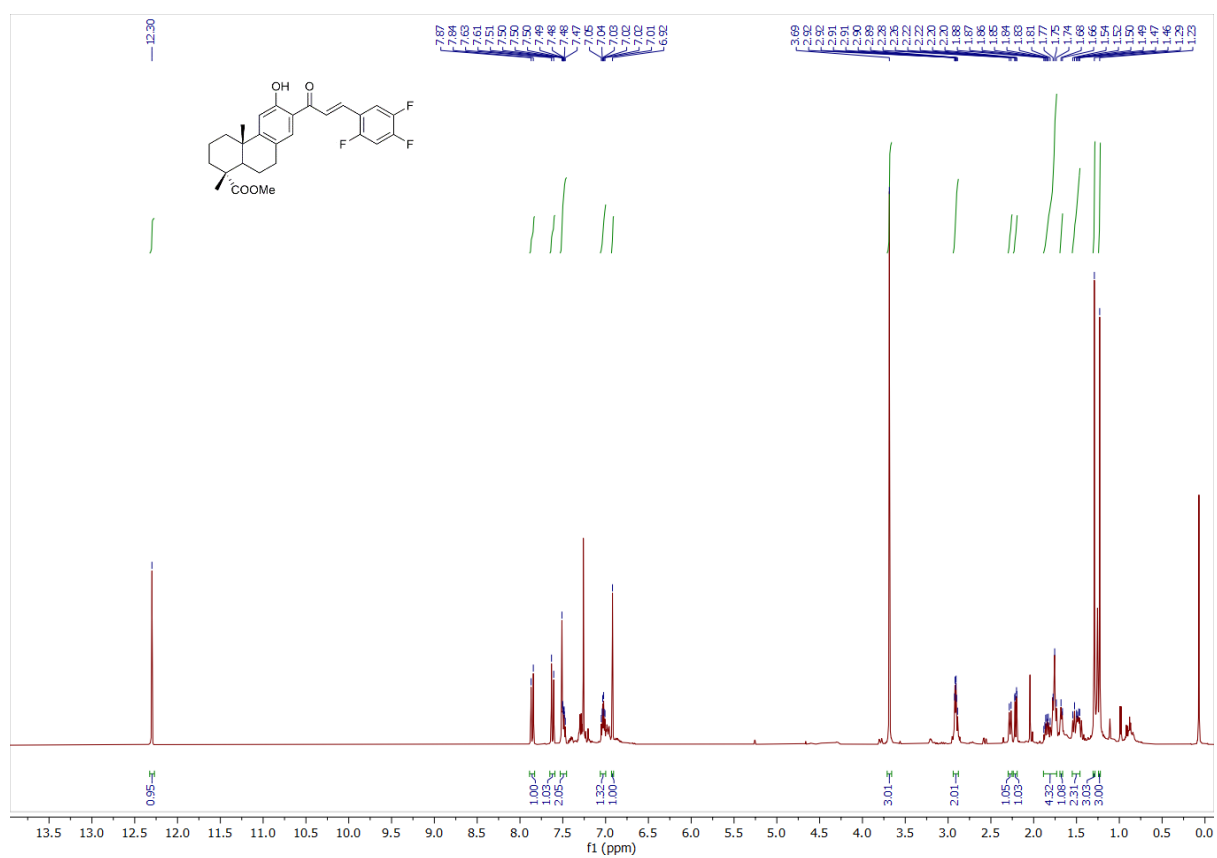

Figure S12. <sup>1</sup>H-NMR spectrum of compound 36.

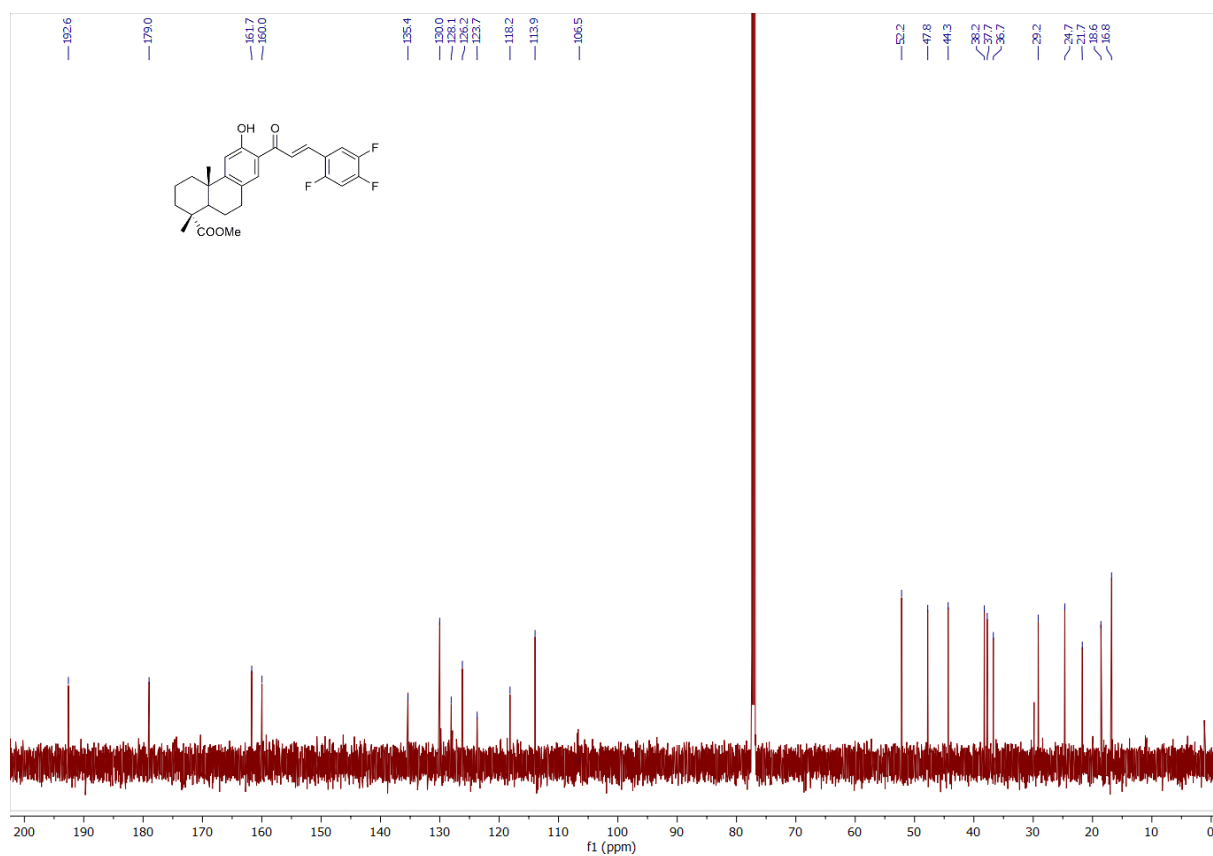

Figure S13.  $^{13}\text{C}$ -NMR spectrum of compound 36.

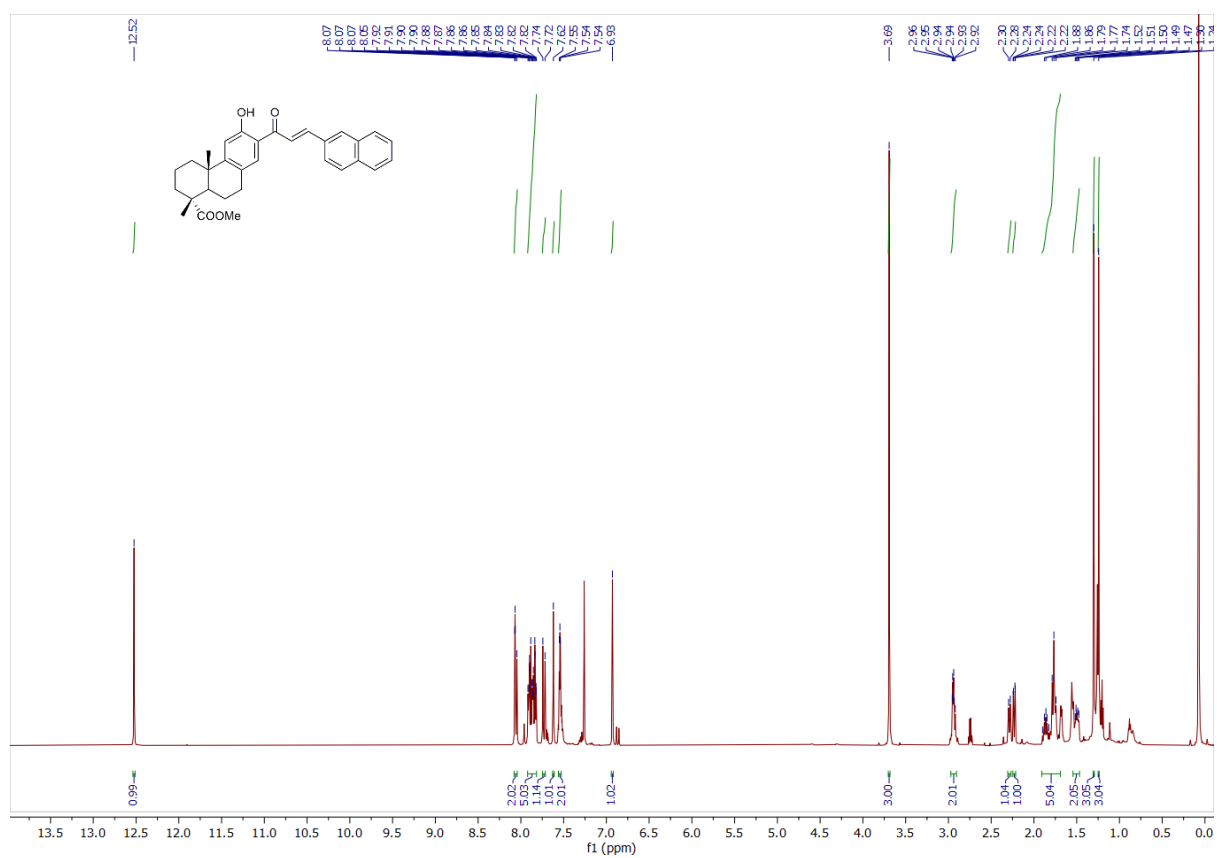

Figure S14.  $^1\text{H}$ -NMR spectrum of compound 37.

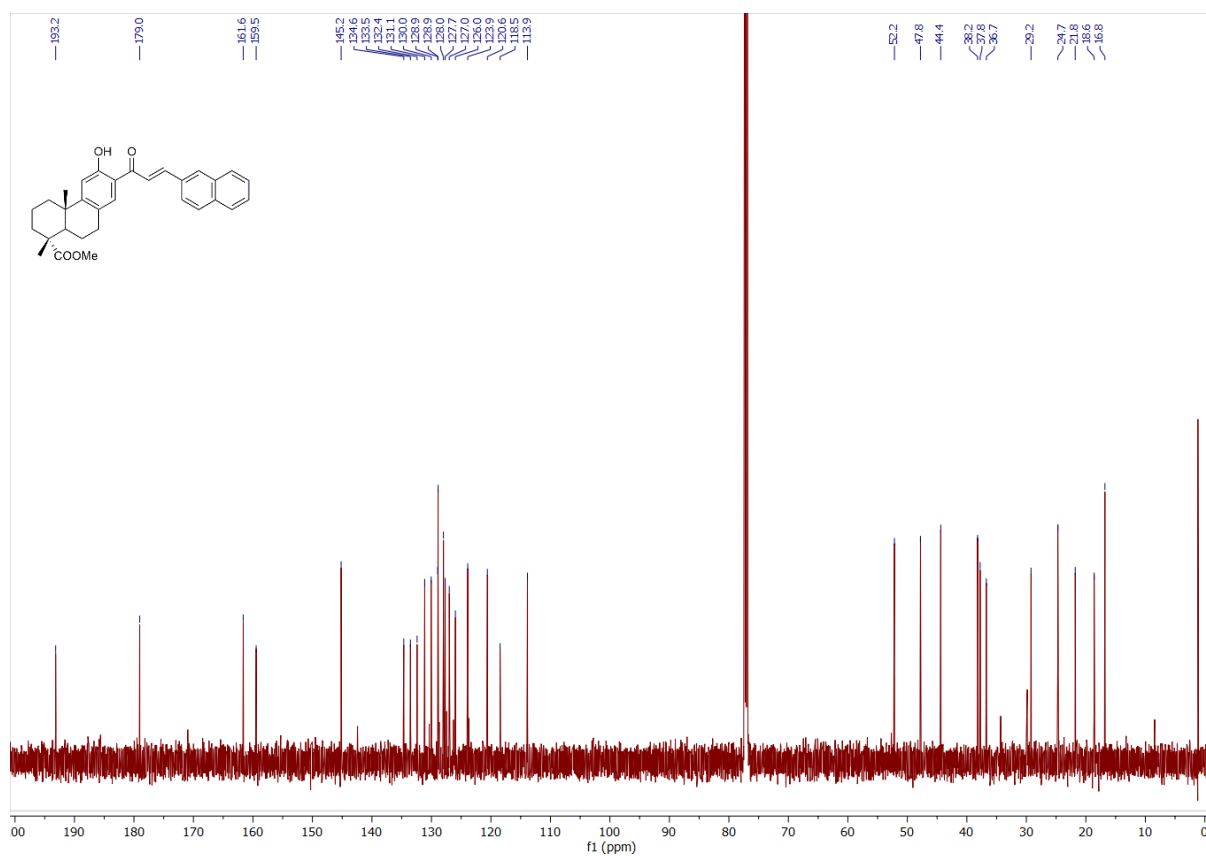

Figure S15. <sup>13</sup>C-NMR spectrum of compound 37.

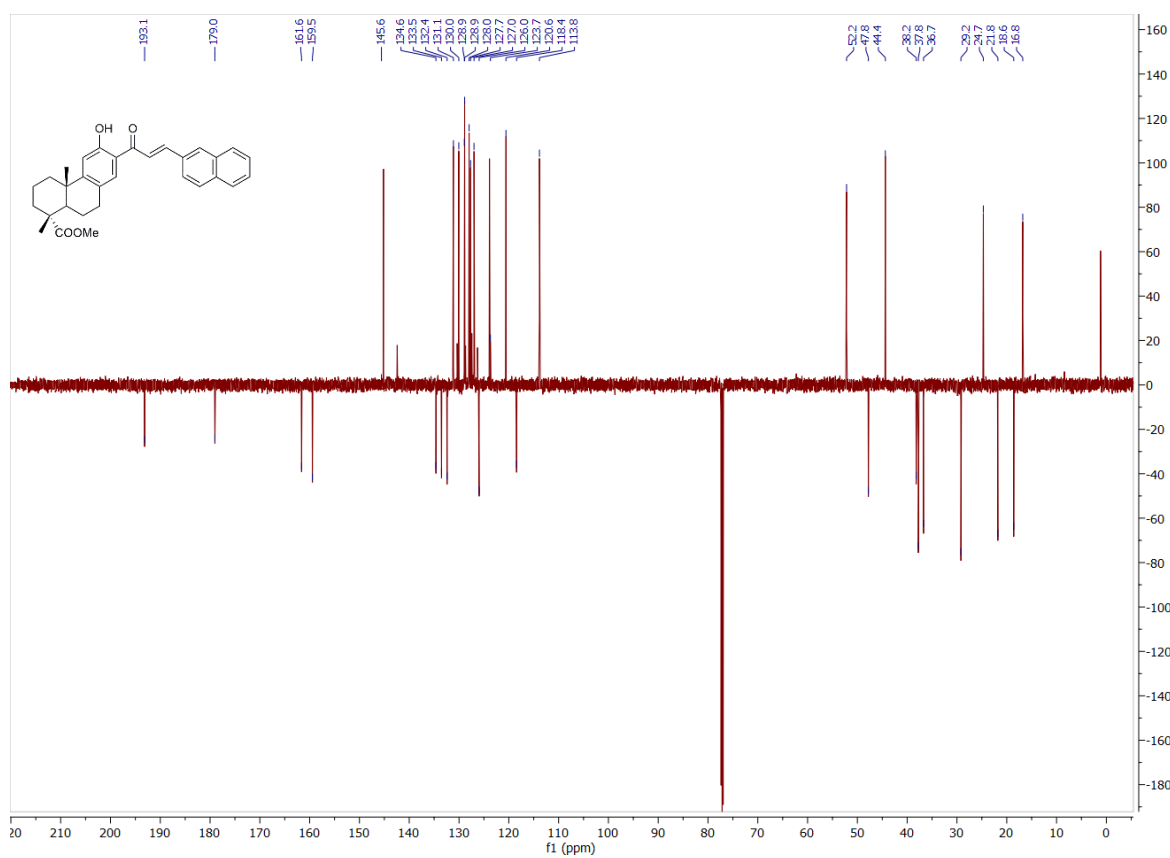

Figure S16. APT-NMR spectrum of compound 37.

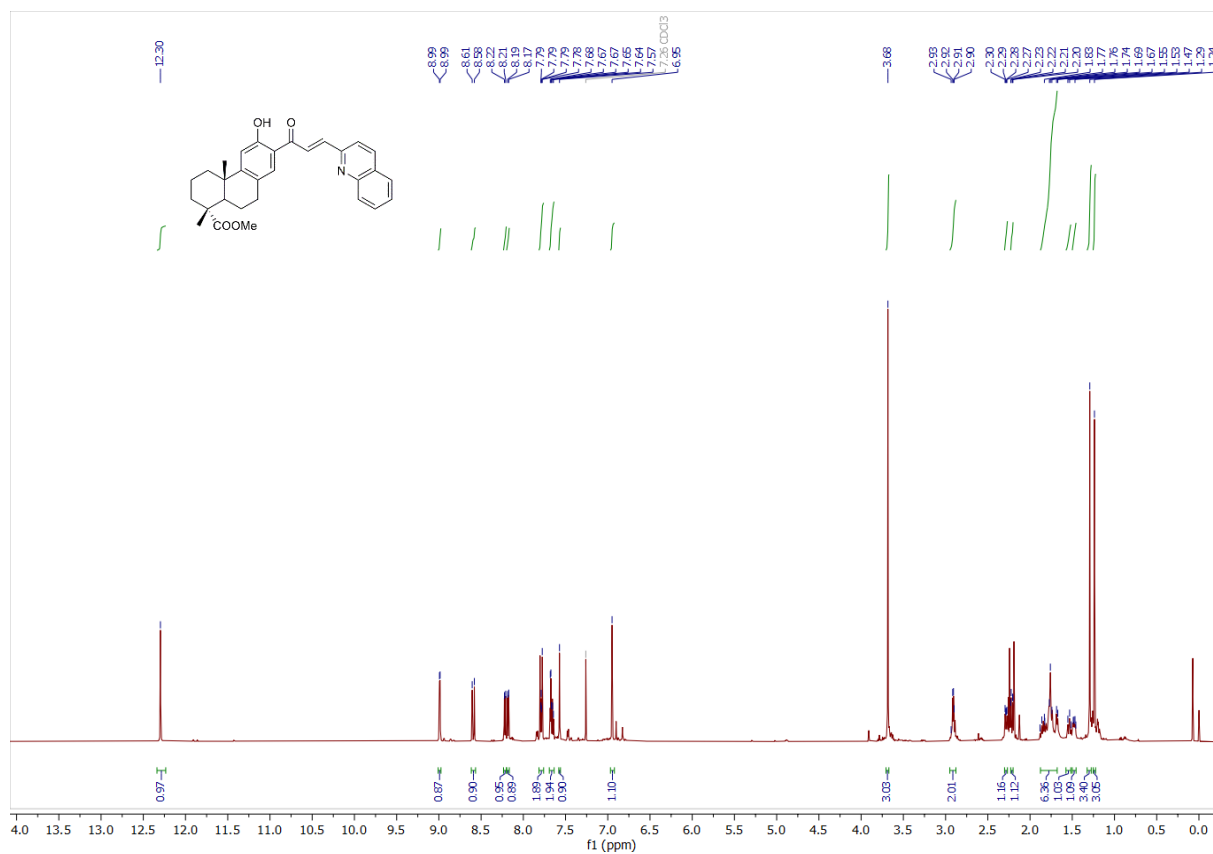

Figure S17. <sup>1</sup>H-NMR spectrum of compound 38.

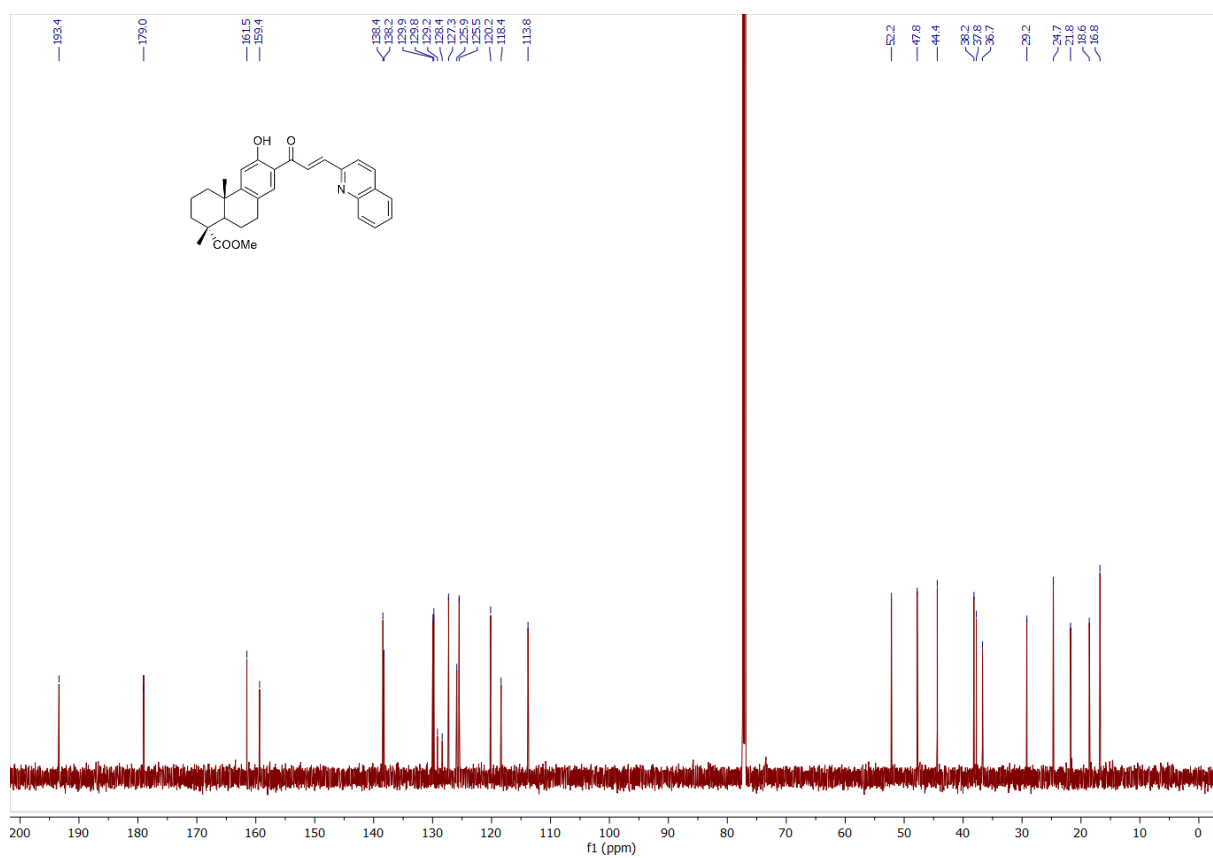

Figure S18. <sup>13</sup>C-NMR spectrum of compound 38.

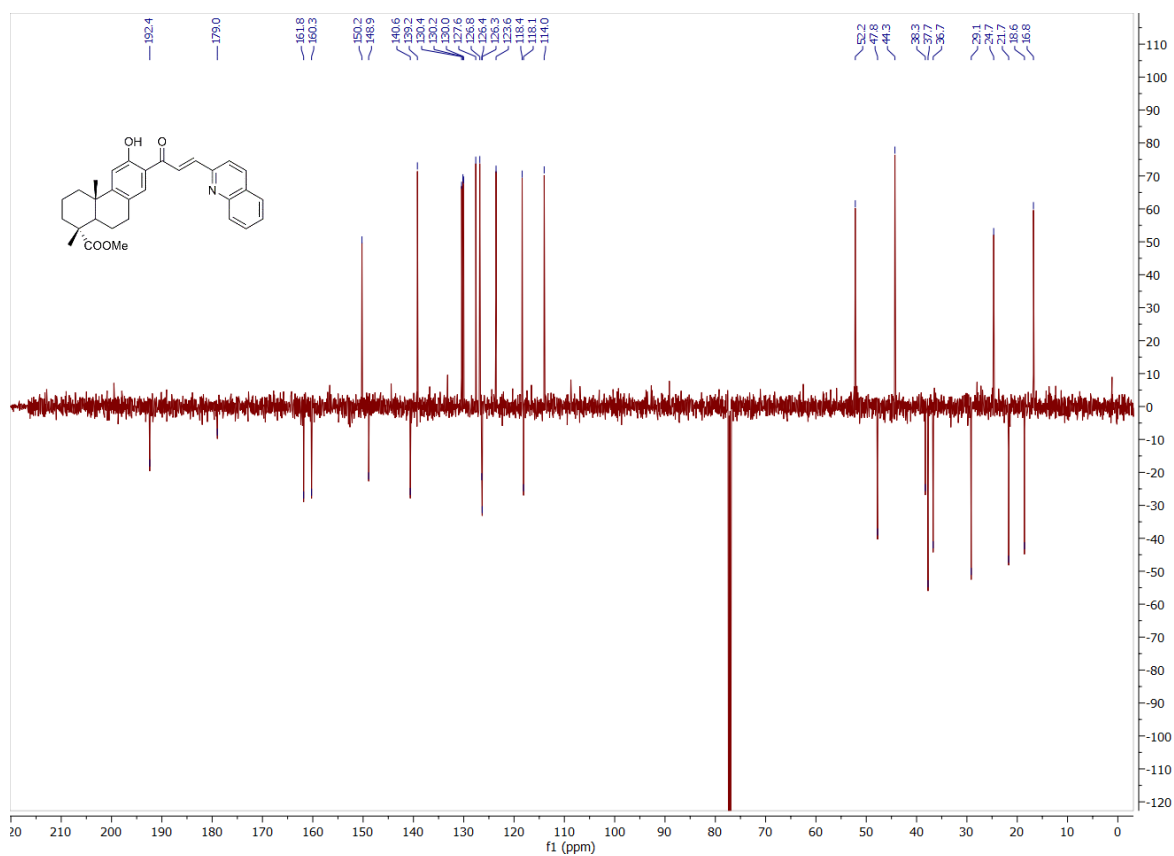

Figure S19. APT-NMR spectrum of compound 38.

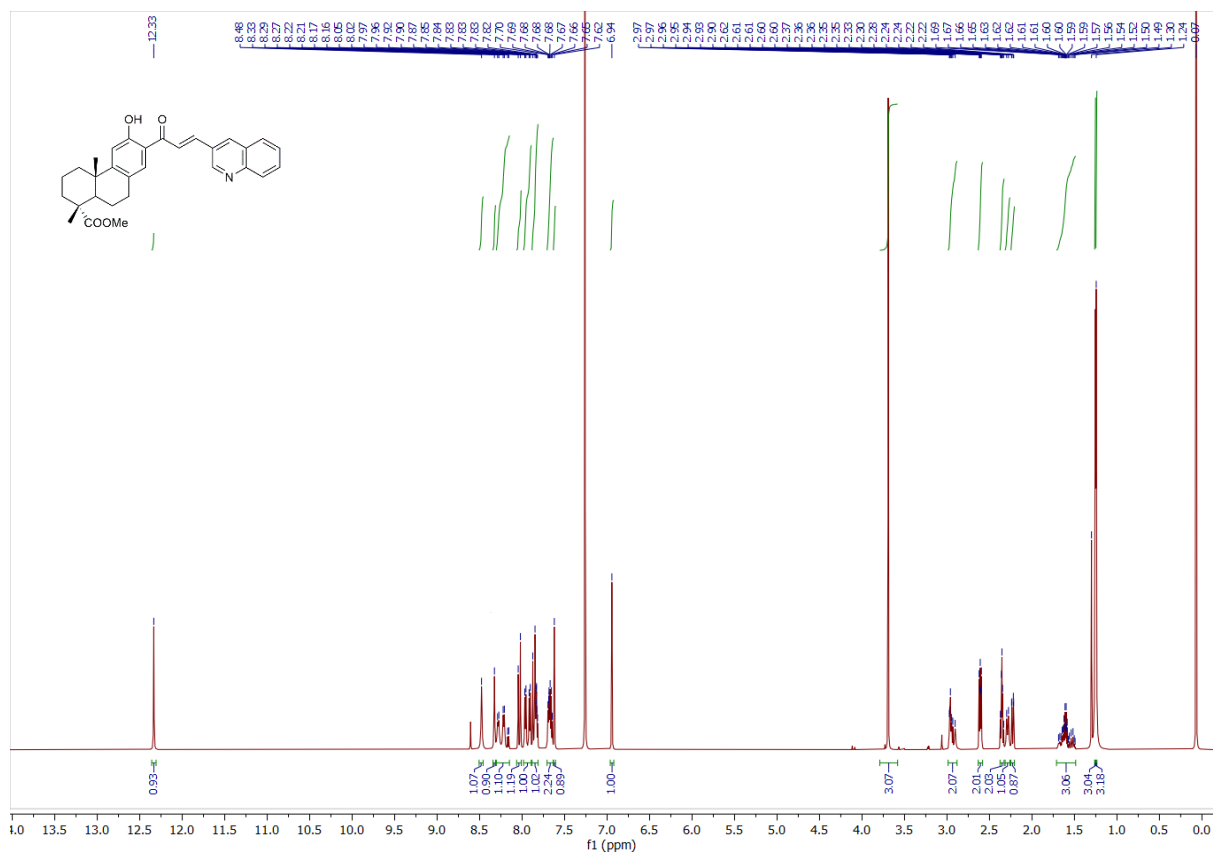

Figure S20. <sup>1</sup>H-NMR spectrum of compound 39.

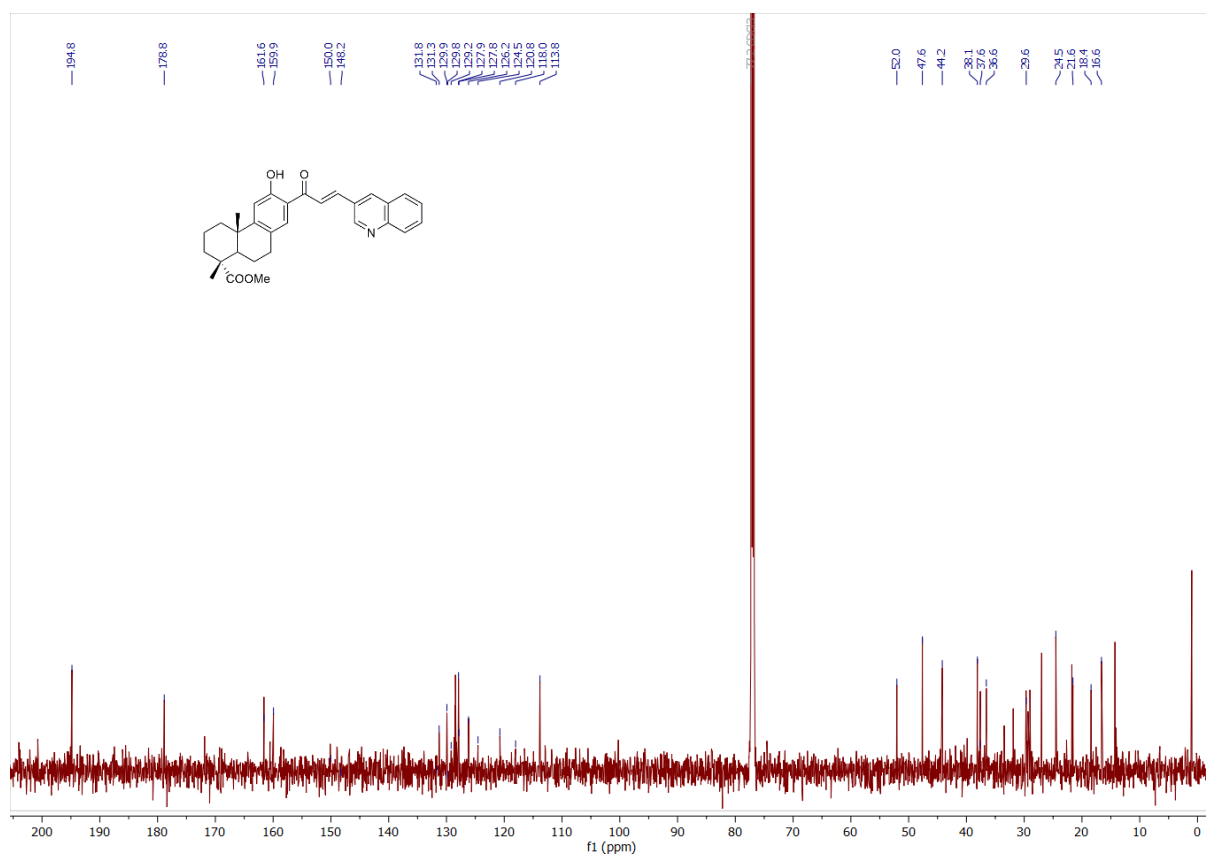

Figure S21.  $^{13}\text{C}$ -NMR spectrum of compound 39.

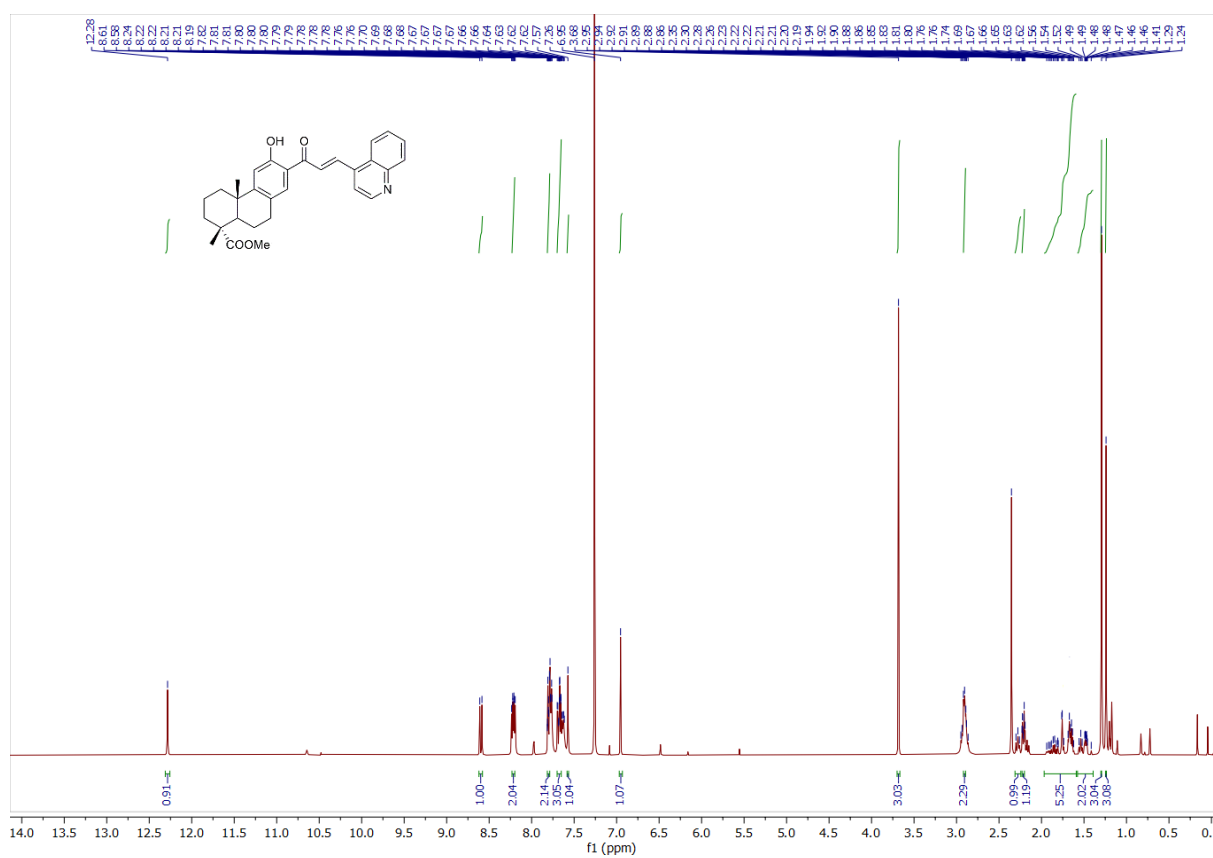

Figure S22. <sup>1</sup>H-NMR spectrum of compound 40.

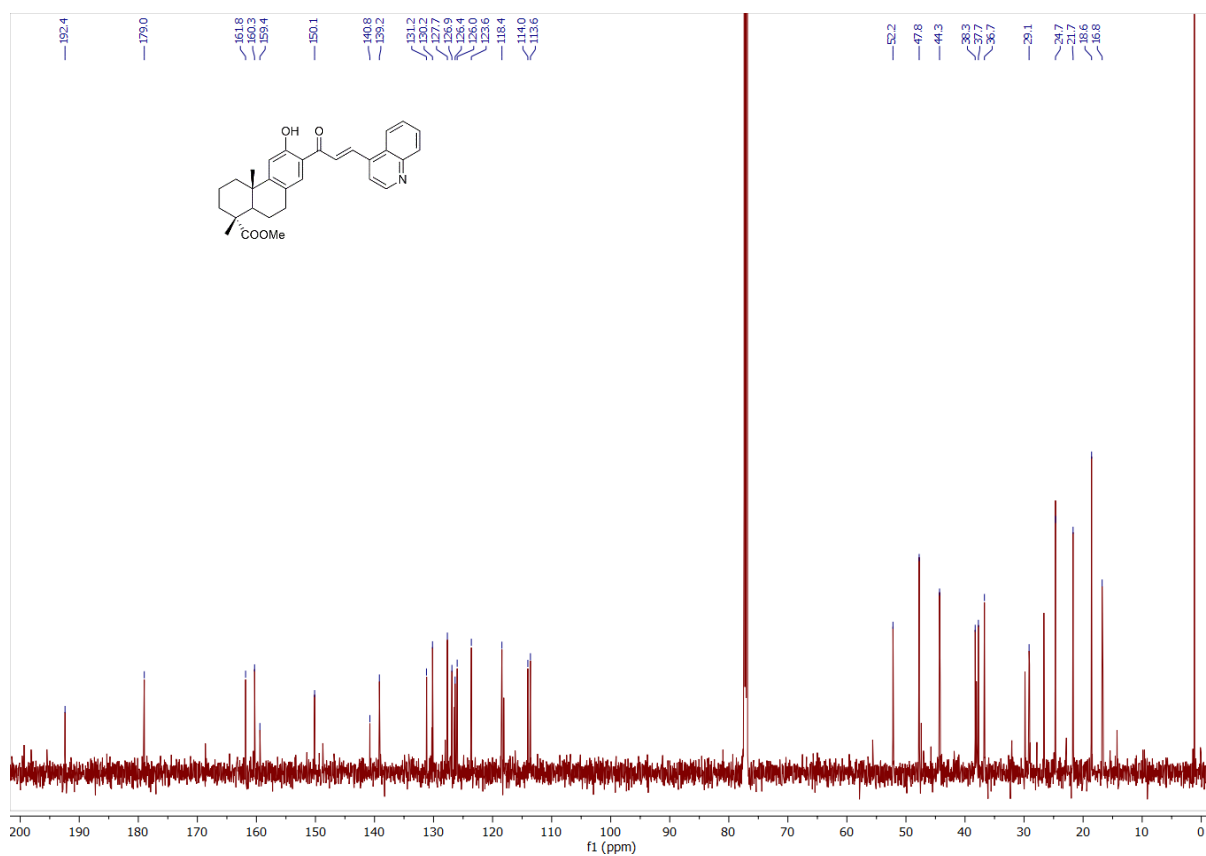

Figure S23. <sup>13</sup>C-NMR spectrum of compound 40.

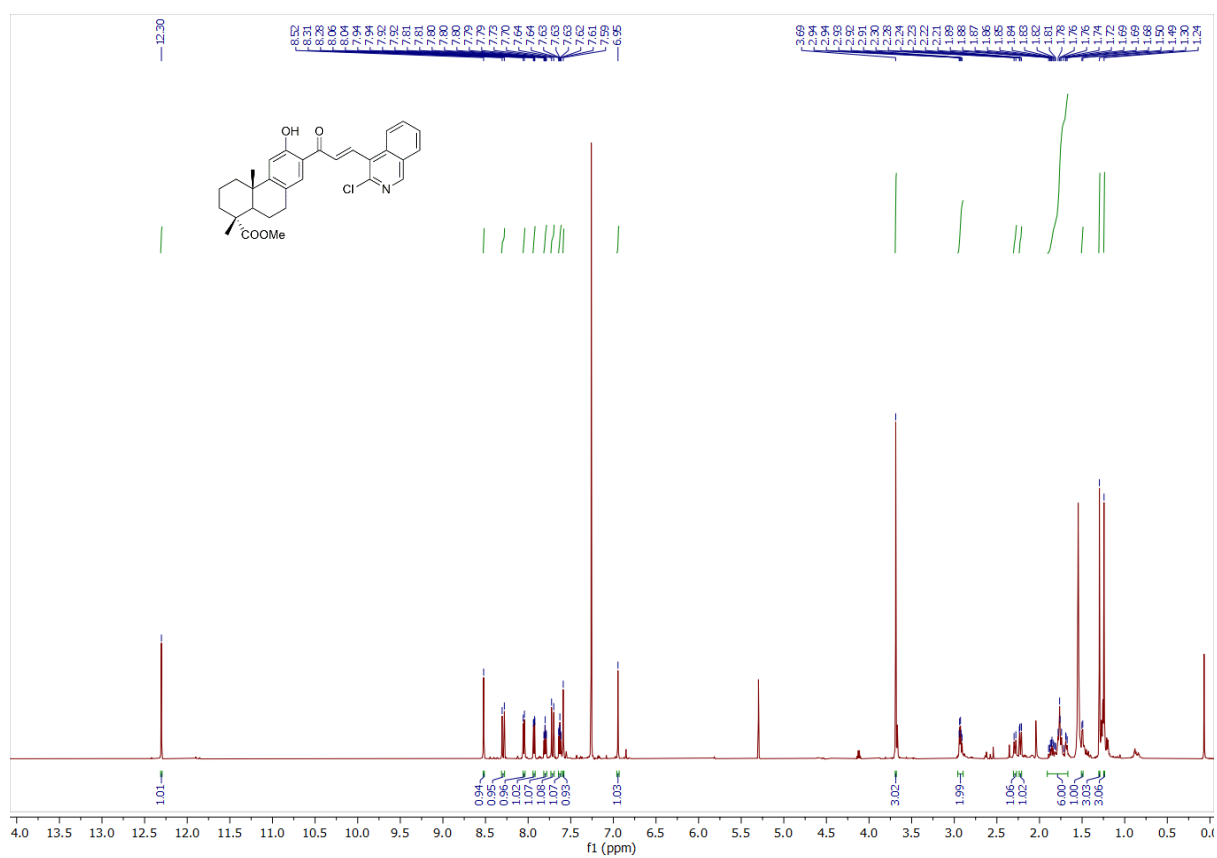

Figure S24. <sup>1</sup>H-NMR spectrum of compound 41.

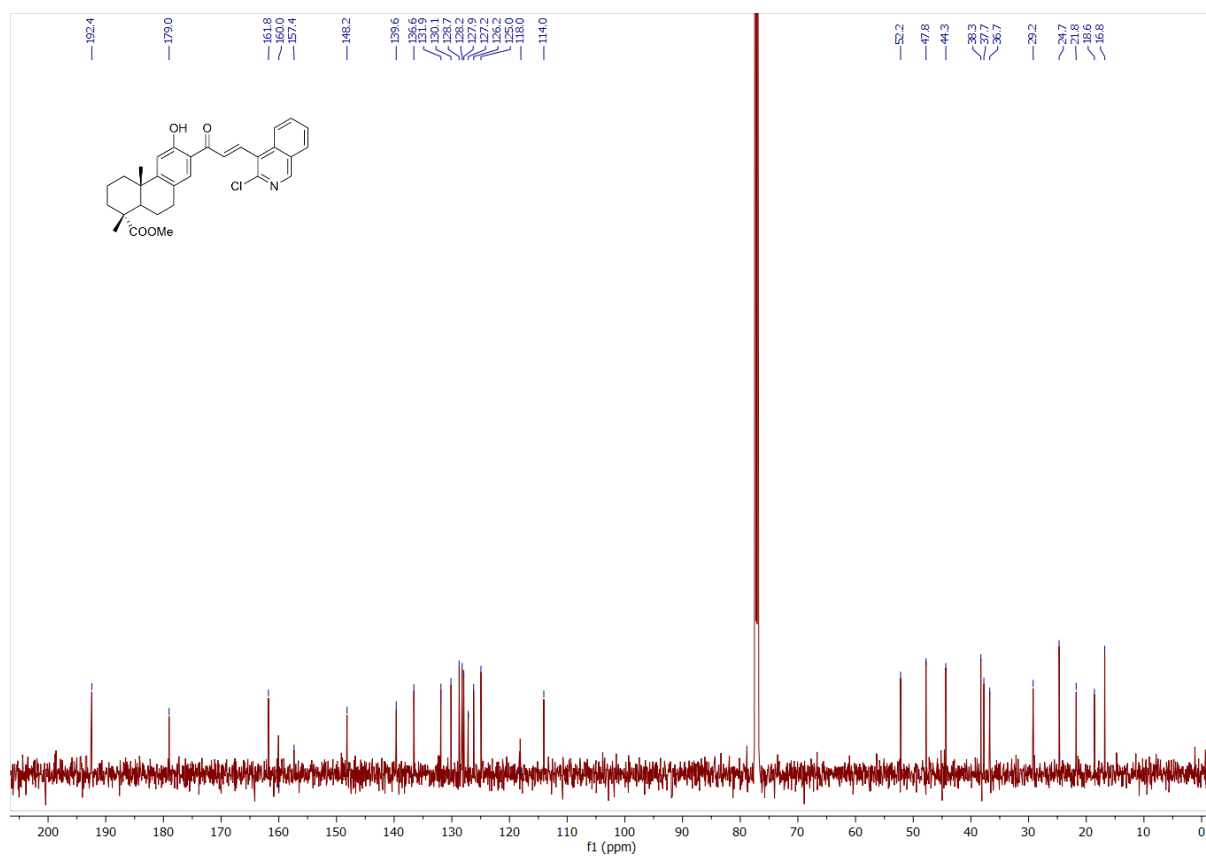

Figure S25.  $^{13}\text{C}$ -NMR spectrum of compound 41.

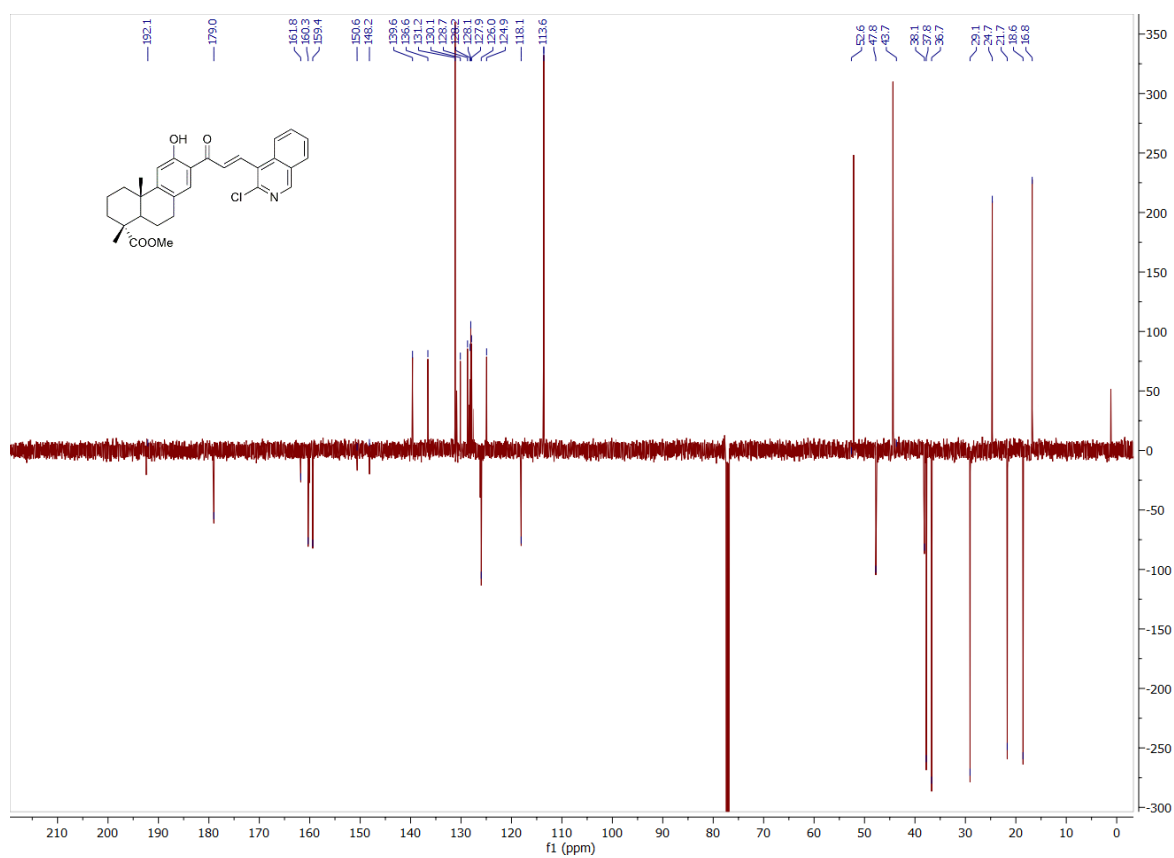

Figure S26. APT-NMR spectrum of compound 41.



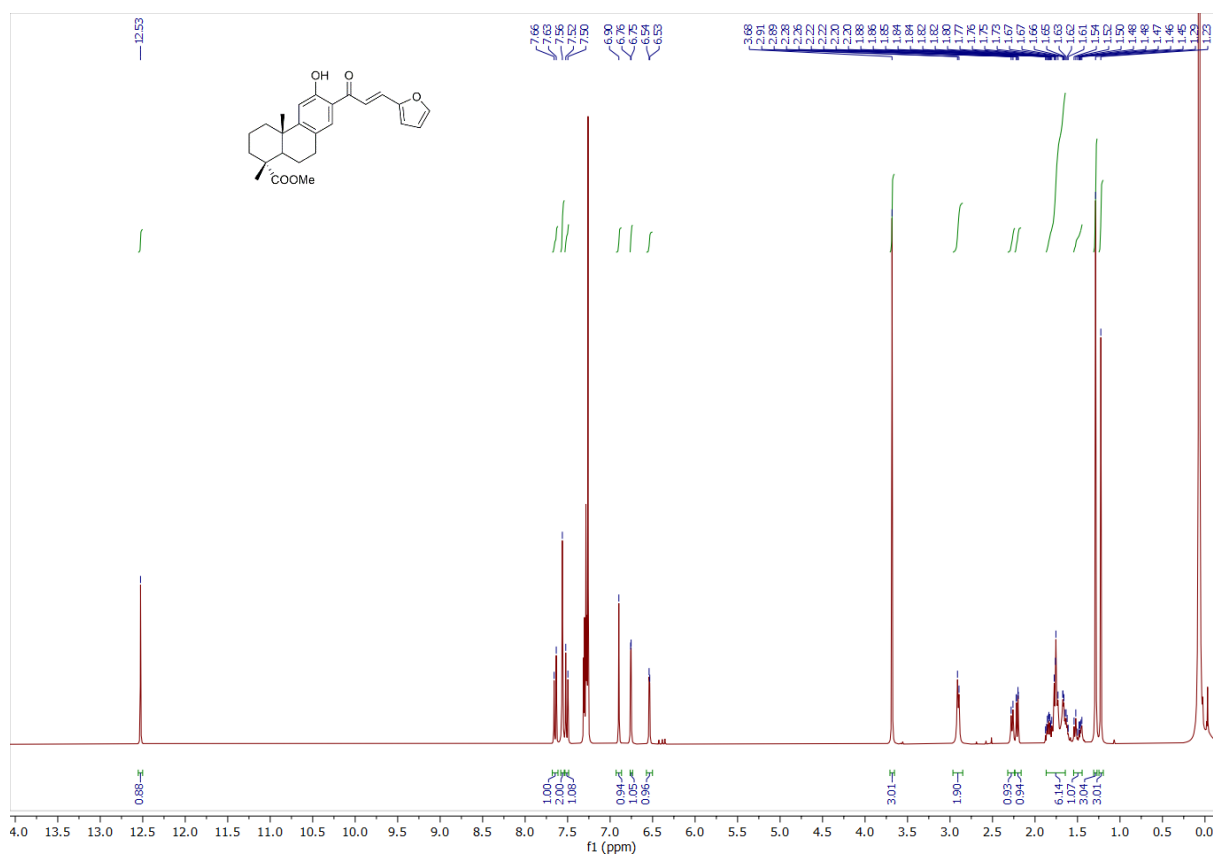

Figure S27. <sup>1</sup>H-NMR spectrum of compound 42.

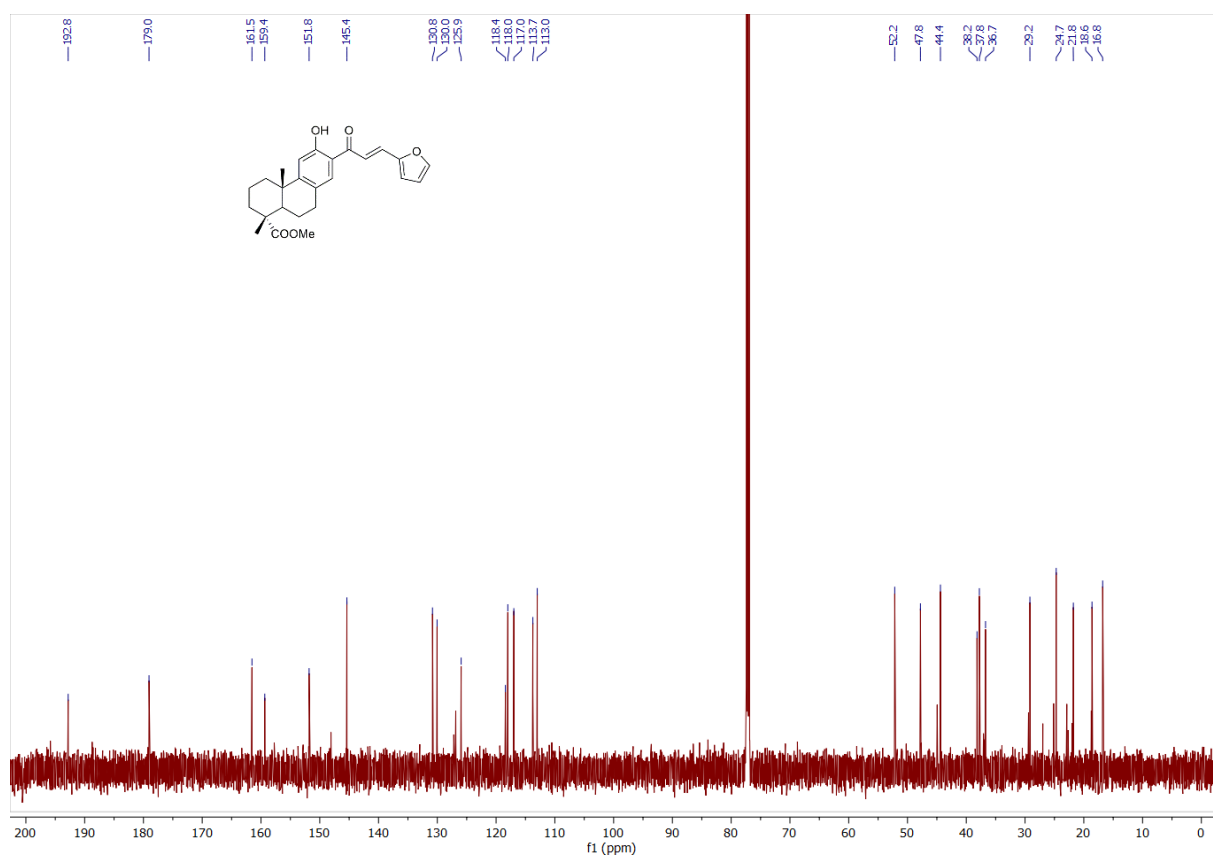

Figure S28. <sup>13</sup>C-NMR spectrum of compound 42.

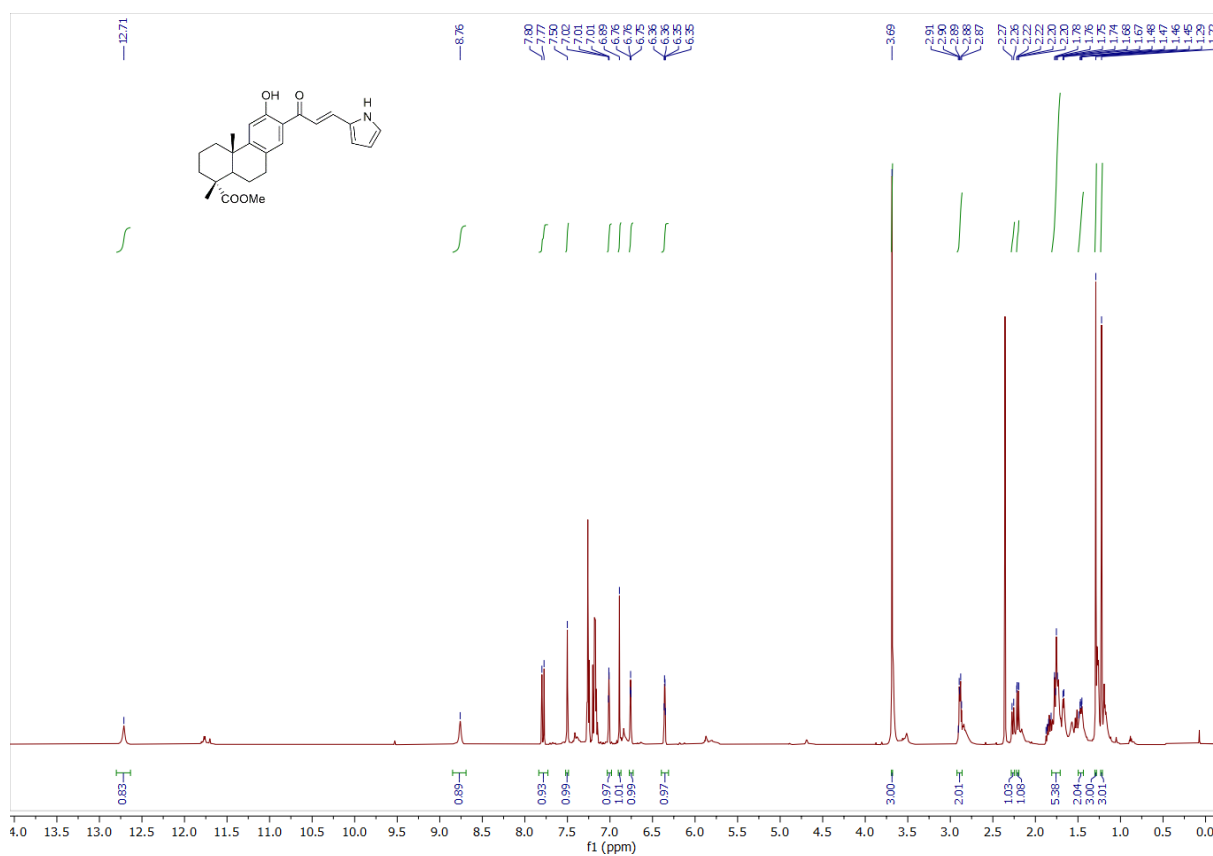

Figure S29. <sup>1</sup>H-NMR spectrum of compound 43.

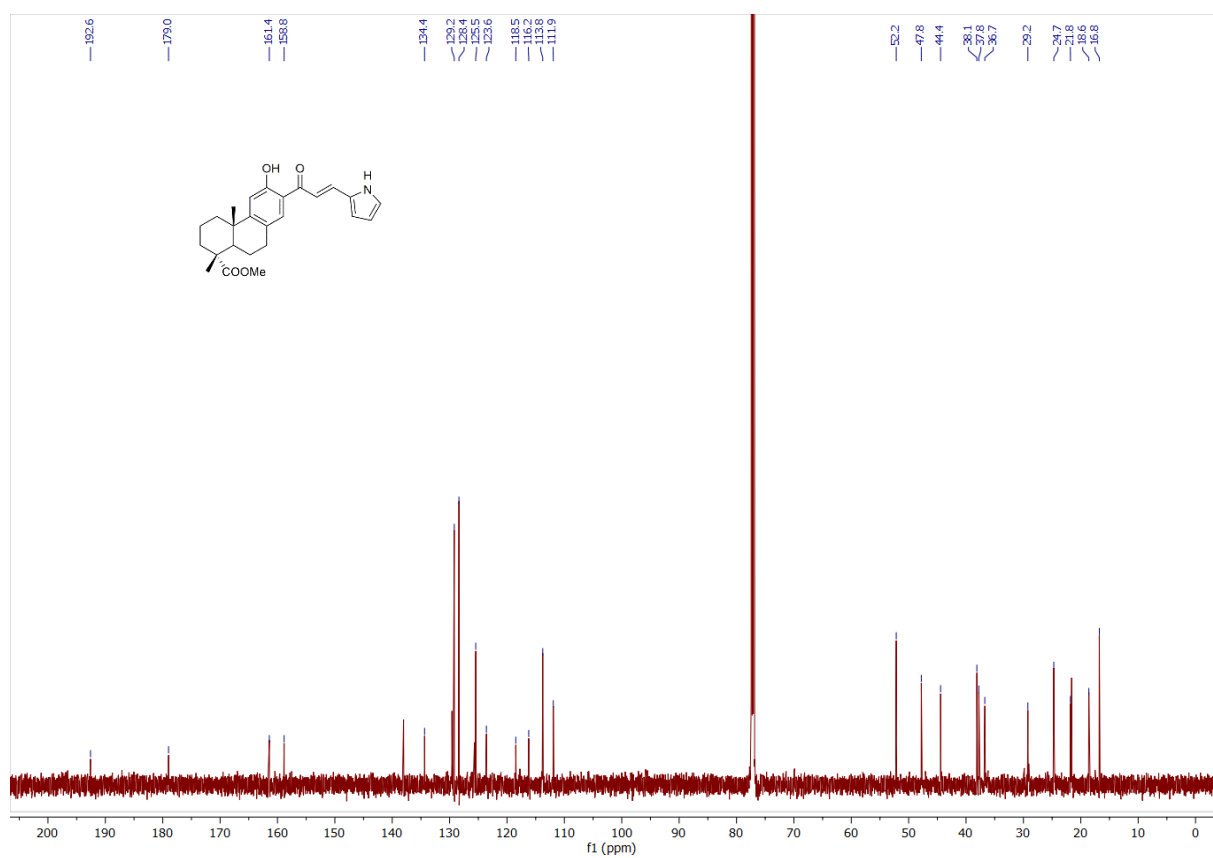

Figure S30. <sup>13</sup>C-NMR spectrum of compound 43.

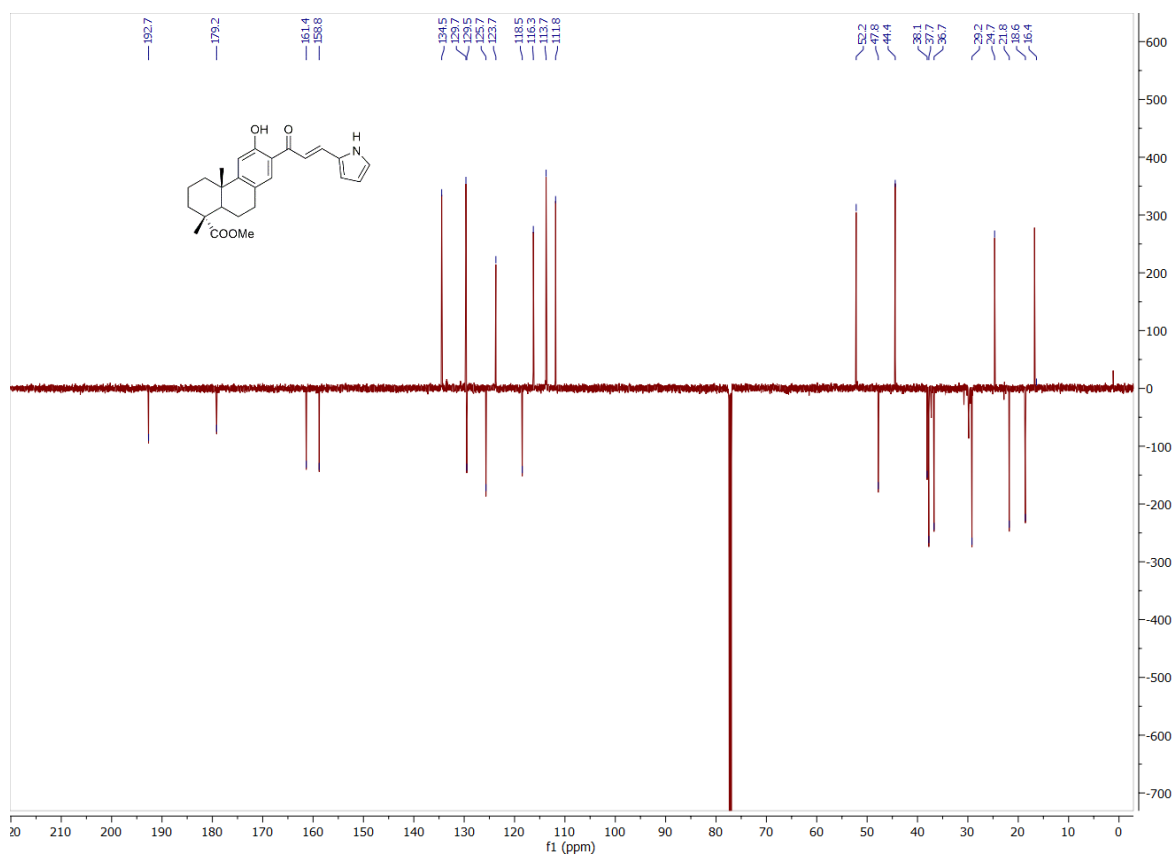

Figure S31. APT-NMR spectrum of compound 43.

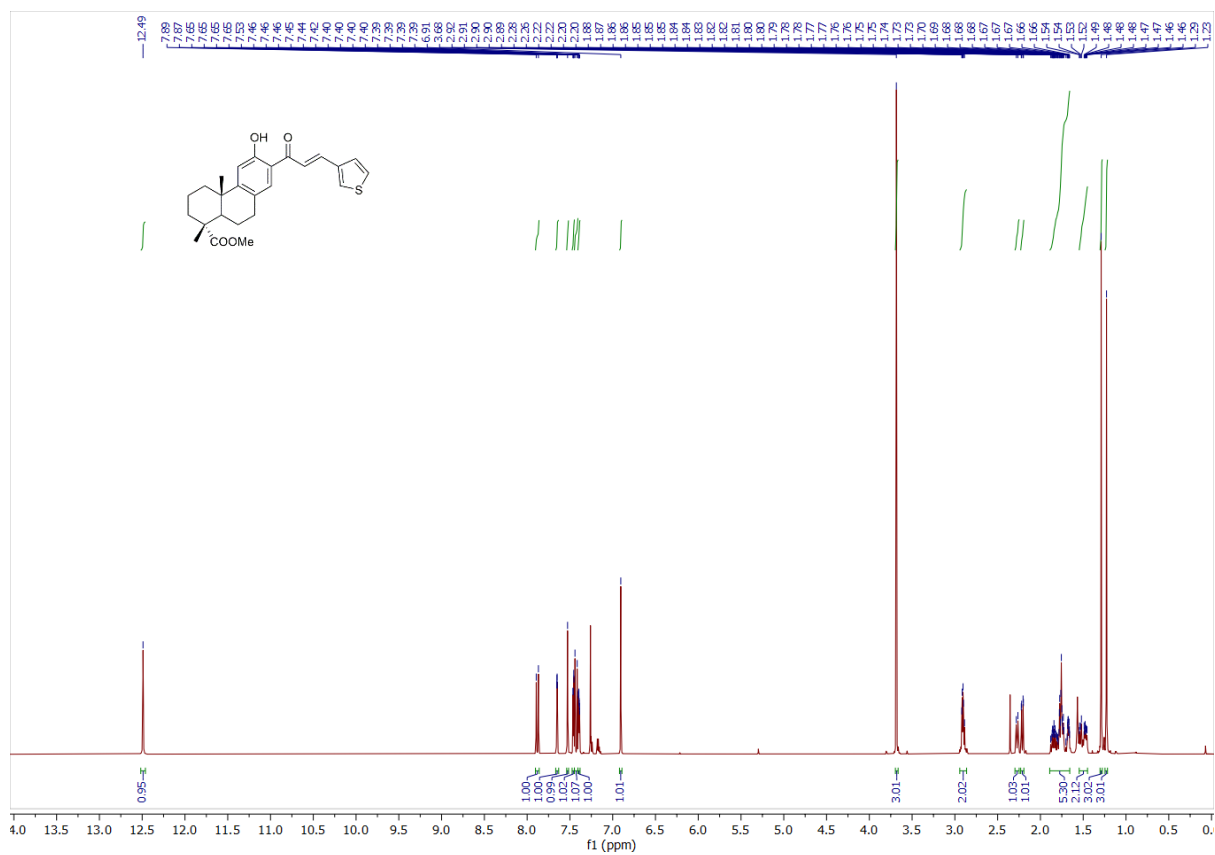

Figure S32.  $^1\text{H}$ -NMR spectrum of compound 44.

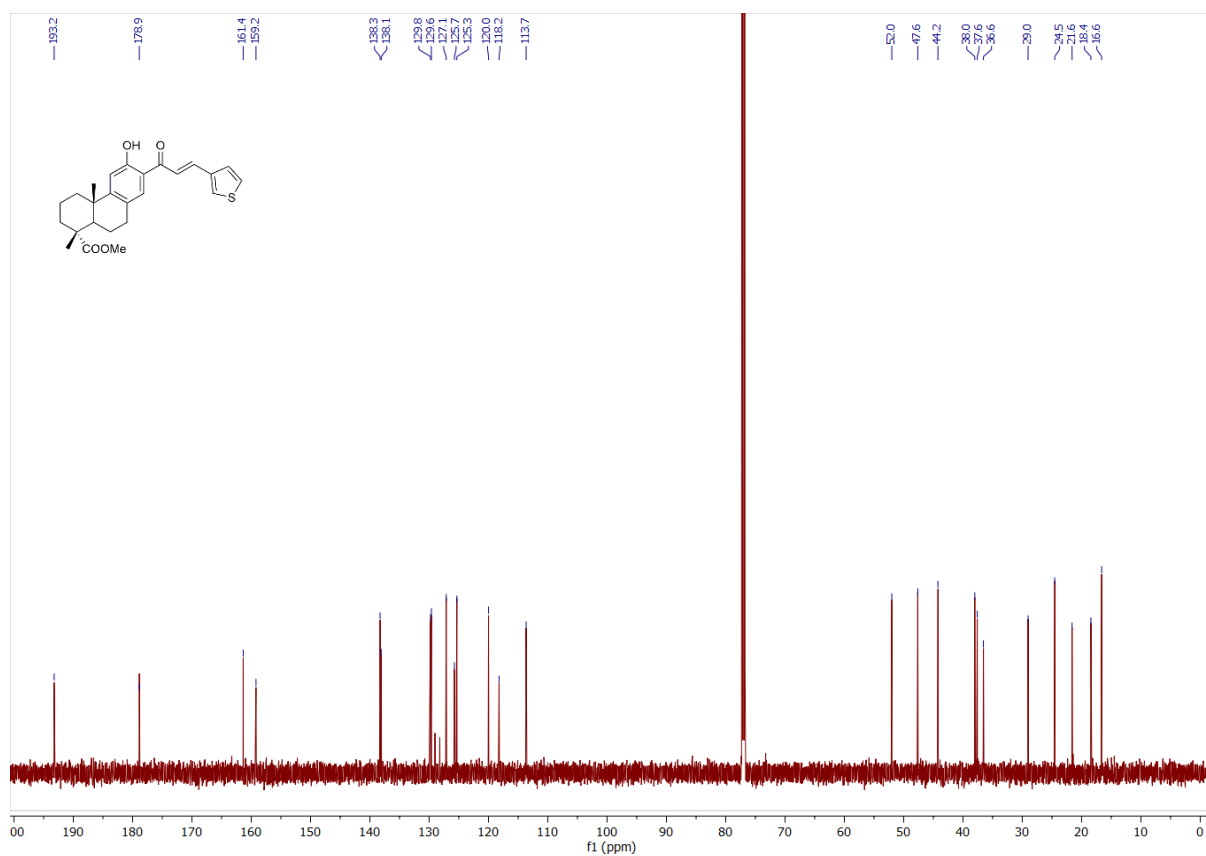

Figure S33. <sup>13</sup>C-NMR spectrum of compound 44.

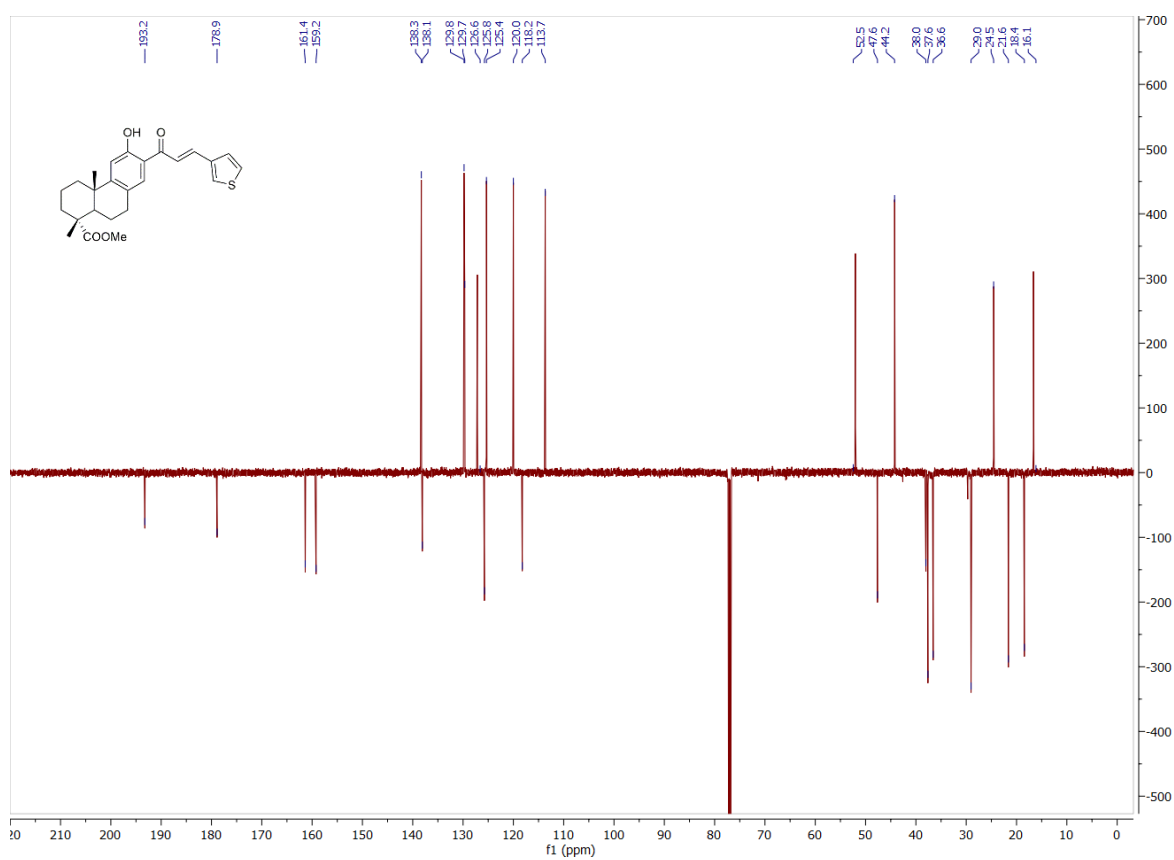

Figure S34. APT-NMR spectrum of compound 44.

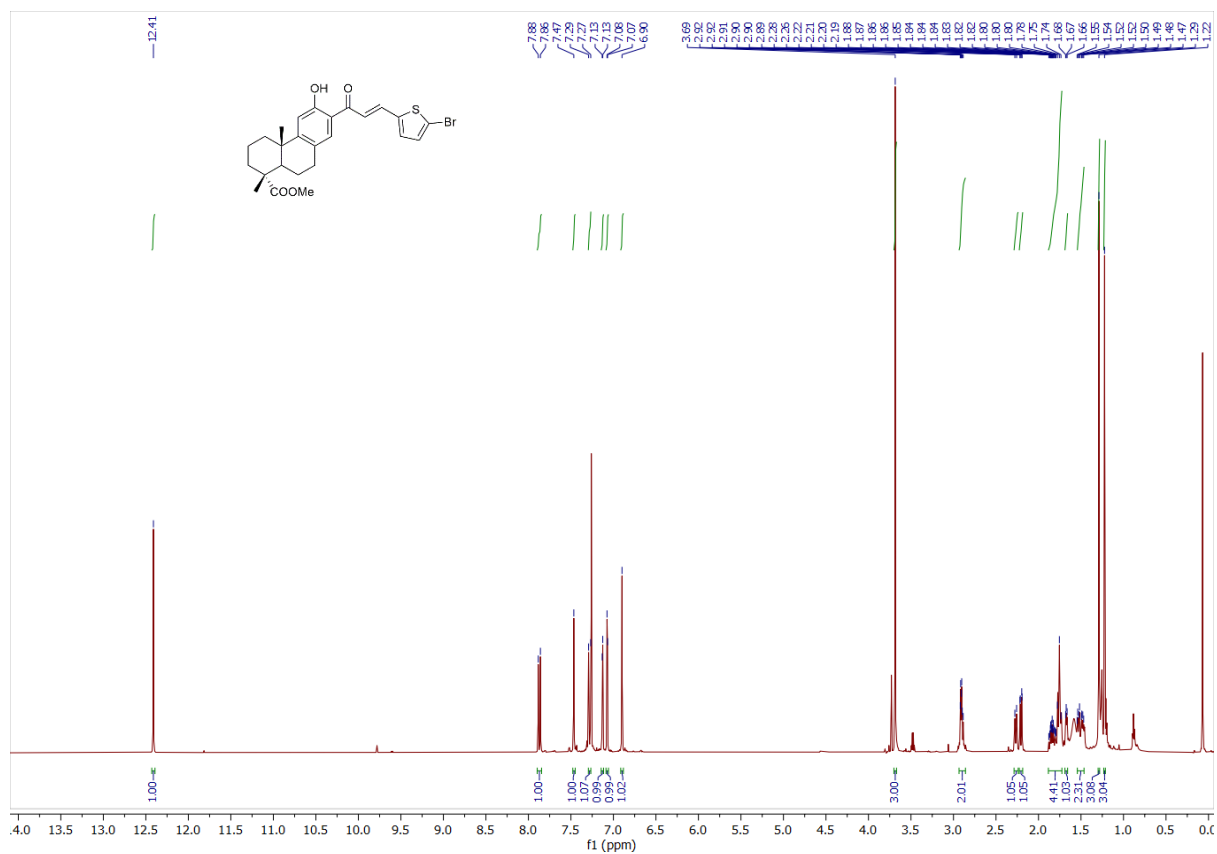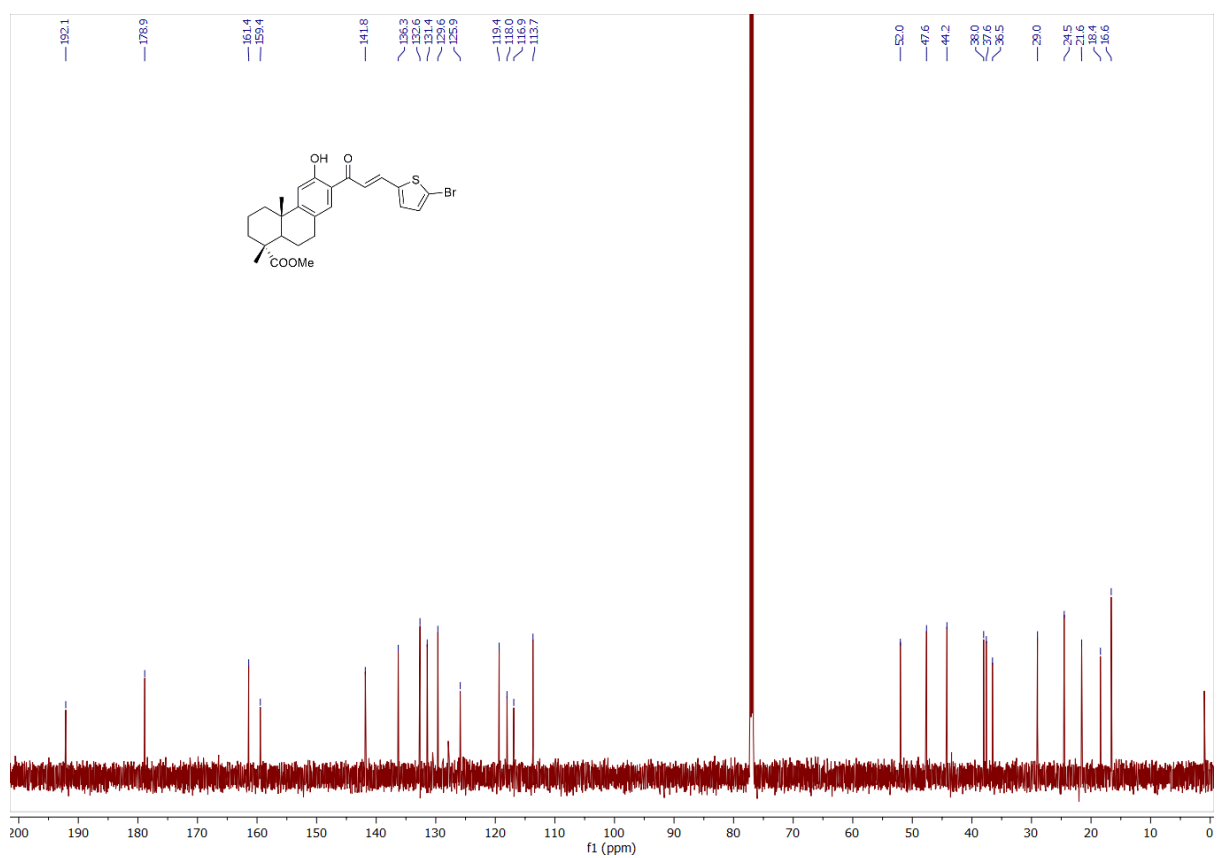

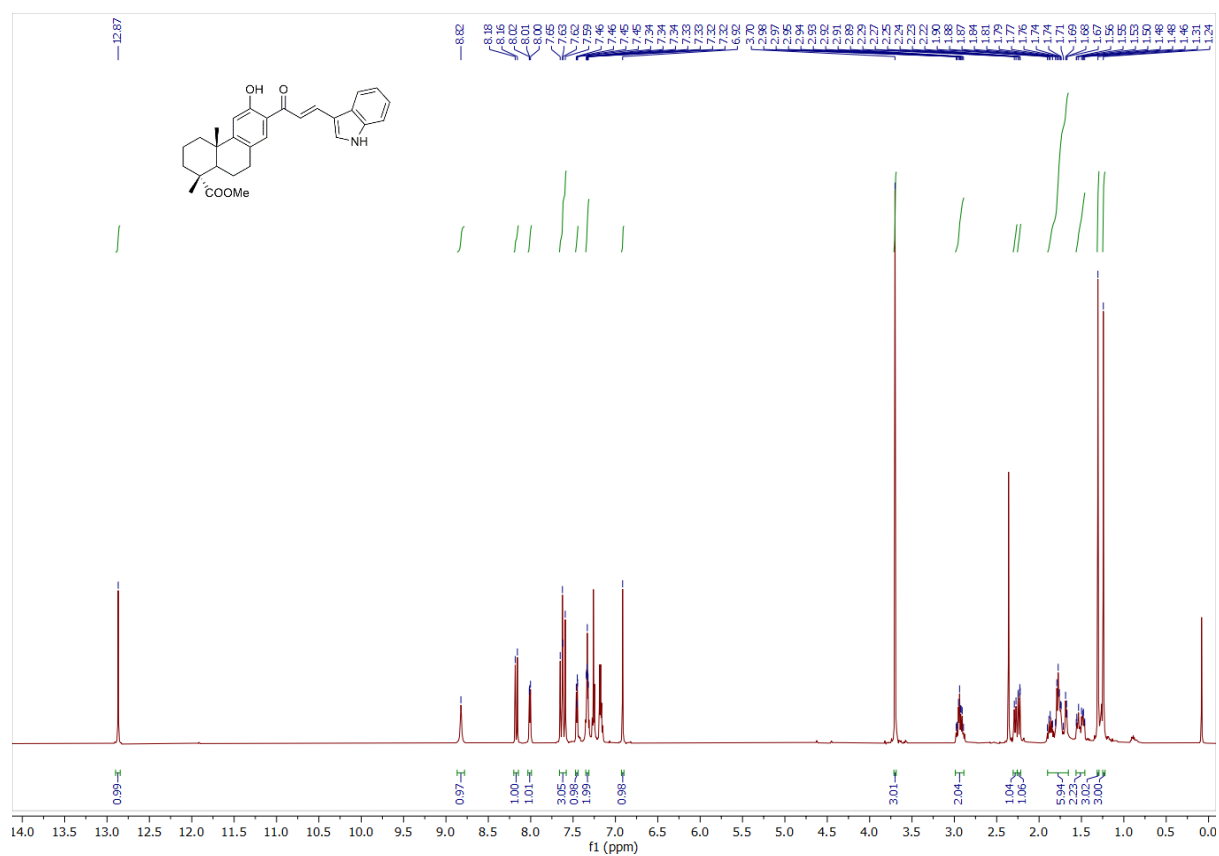

Figure S37. <sup>1</sup>H-NMR spectrum of compound 46.

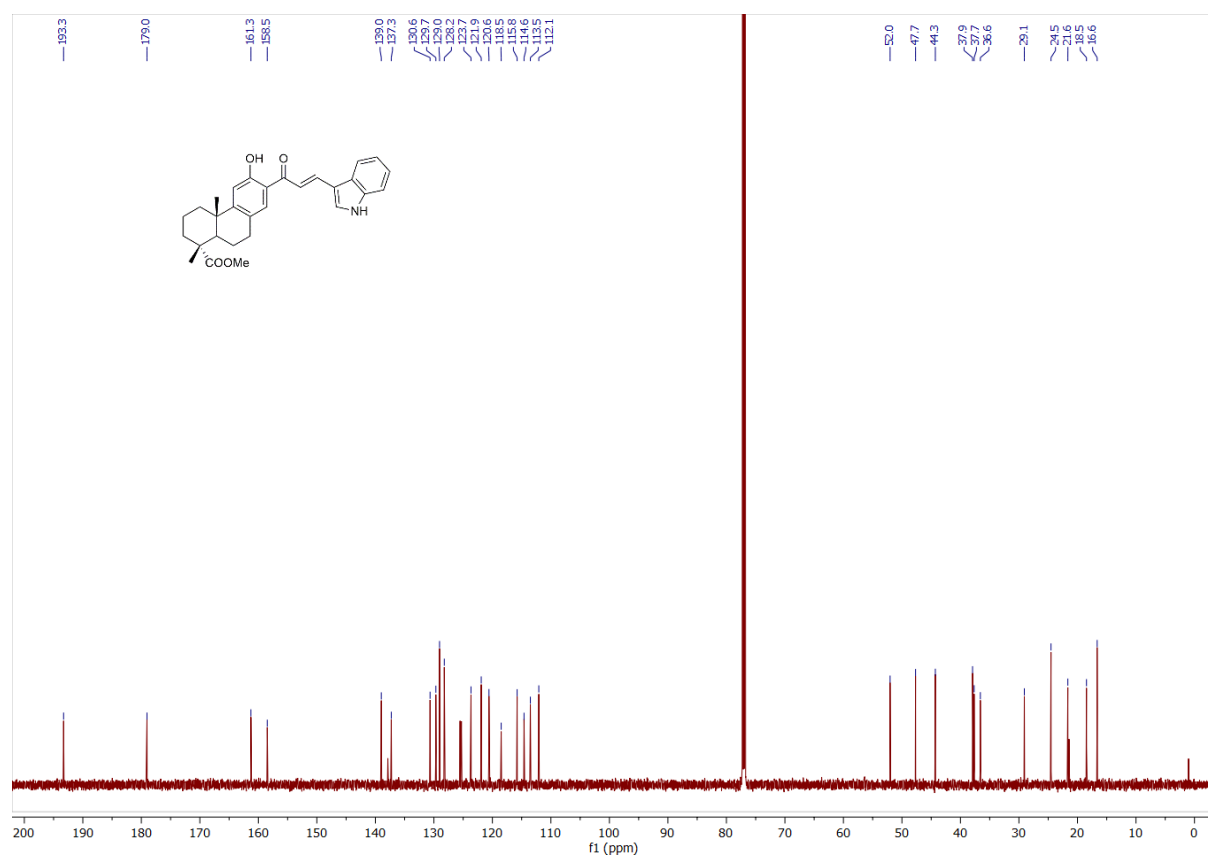

Figure S38. <sup>13</sup>C-NMR spectrum of compound 46.

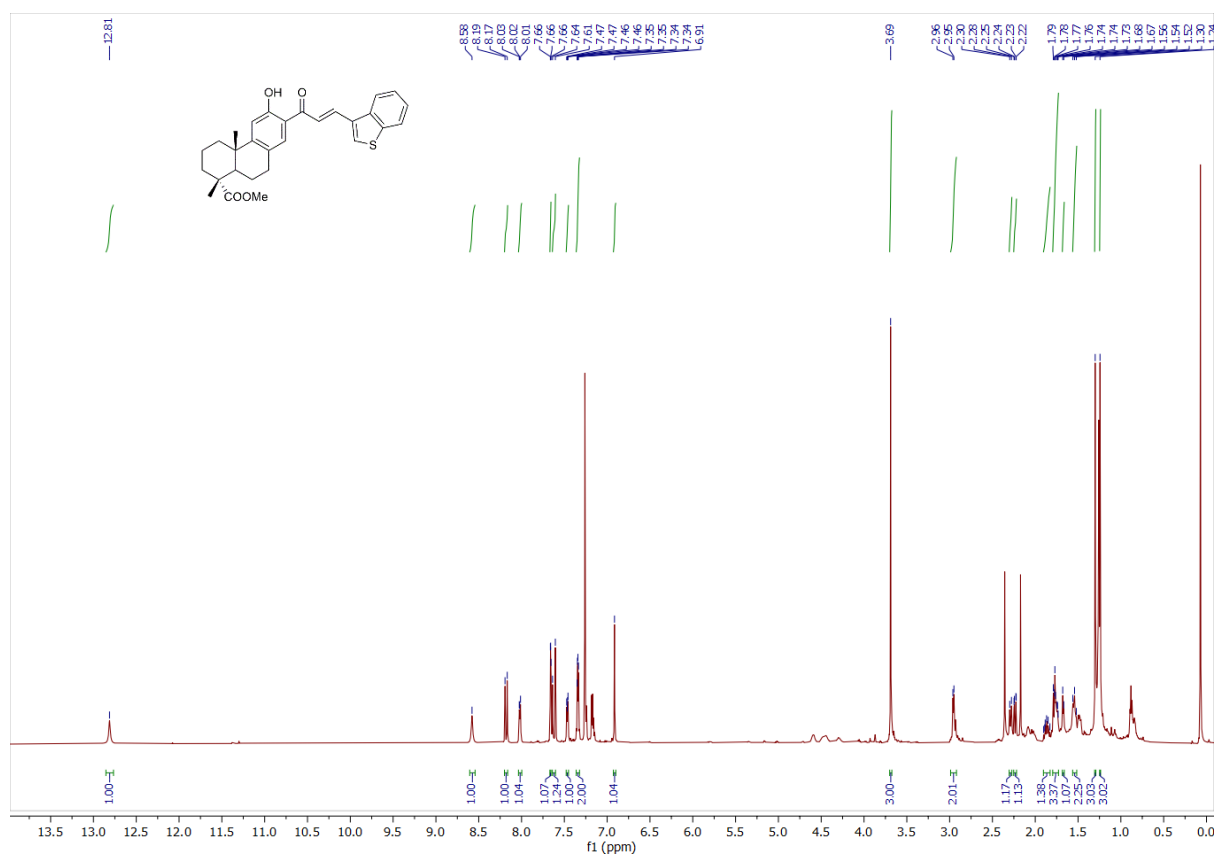

Figure S39. <sup>1</sup>H-NMR spectrum of compound 47.

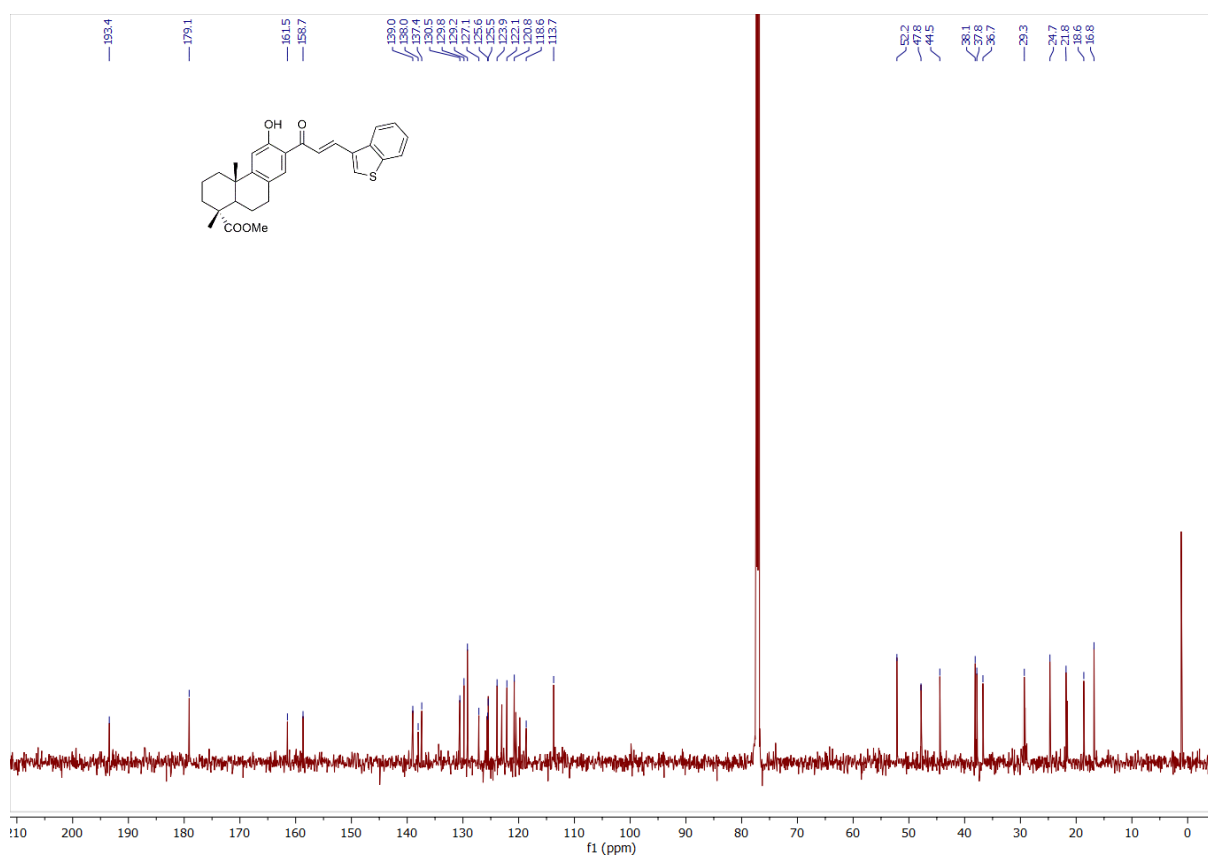

Figure S40. <sup>13</sup>C-NMR spectrum of compound 47.

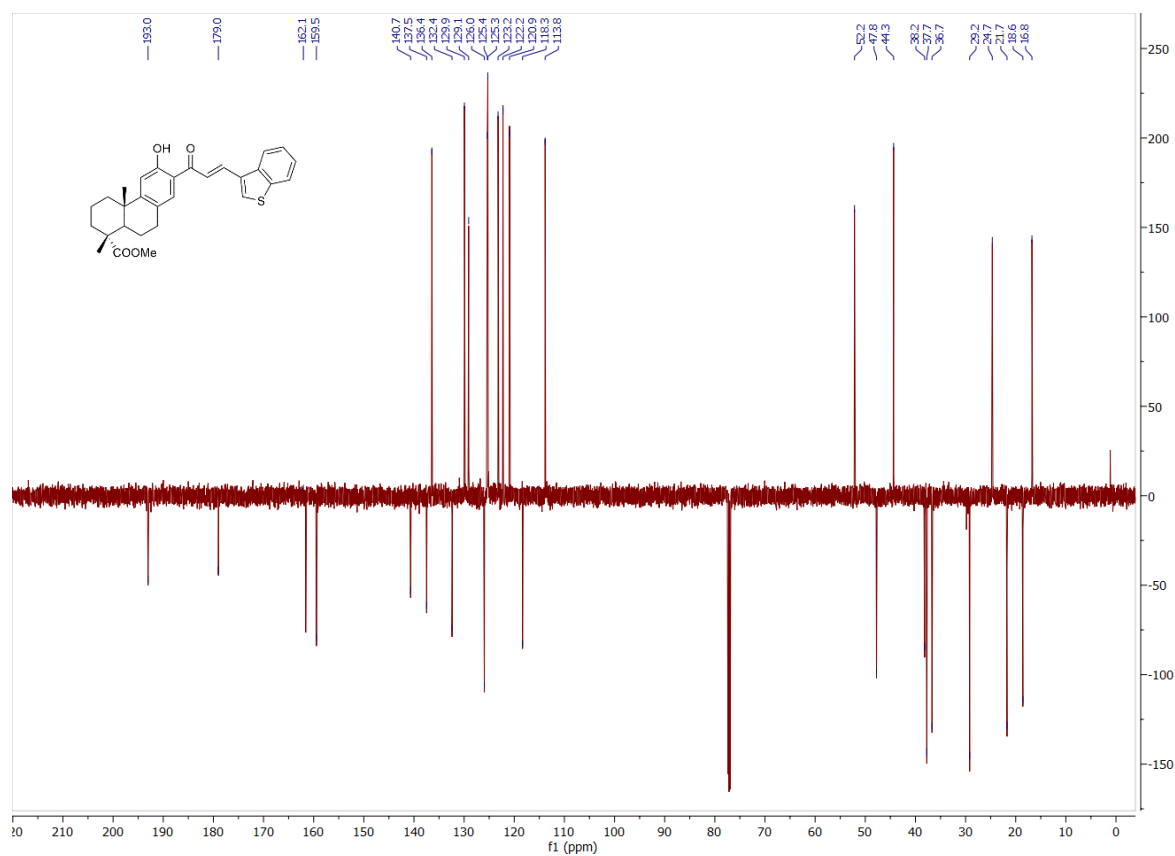

Figure S40. APT-NMR spectrum of compound 47.

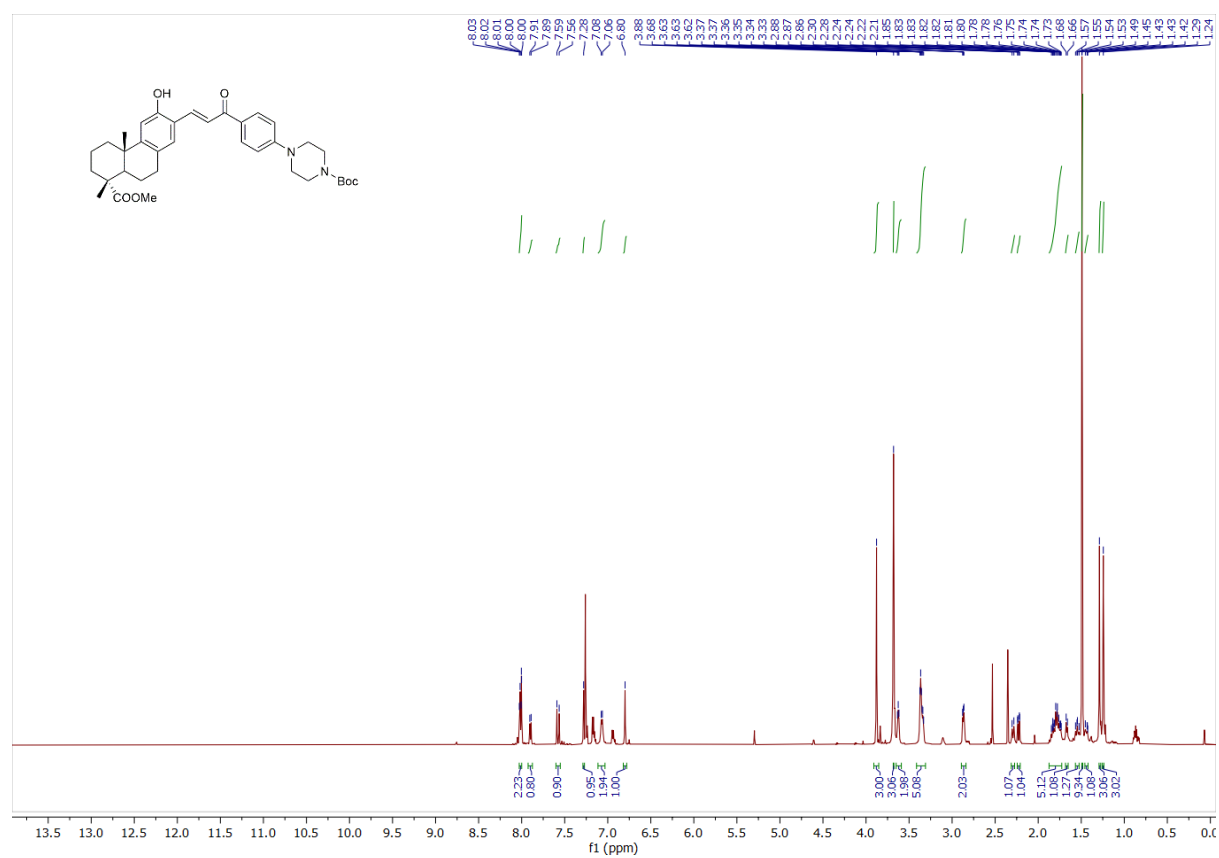

Figure S42. <sup>1</sup>H-NMR spectrum of compound 48.



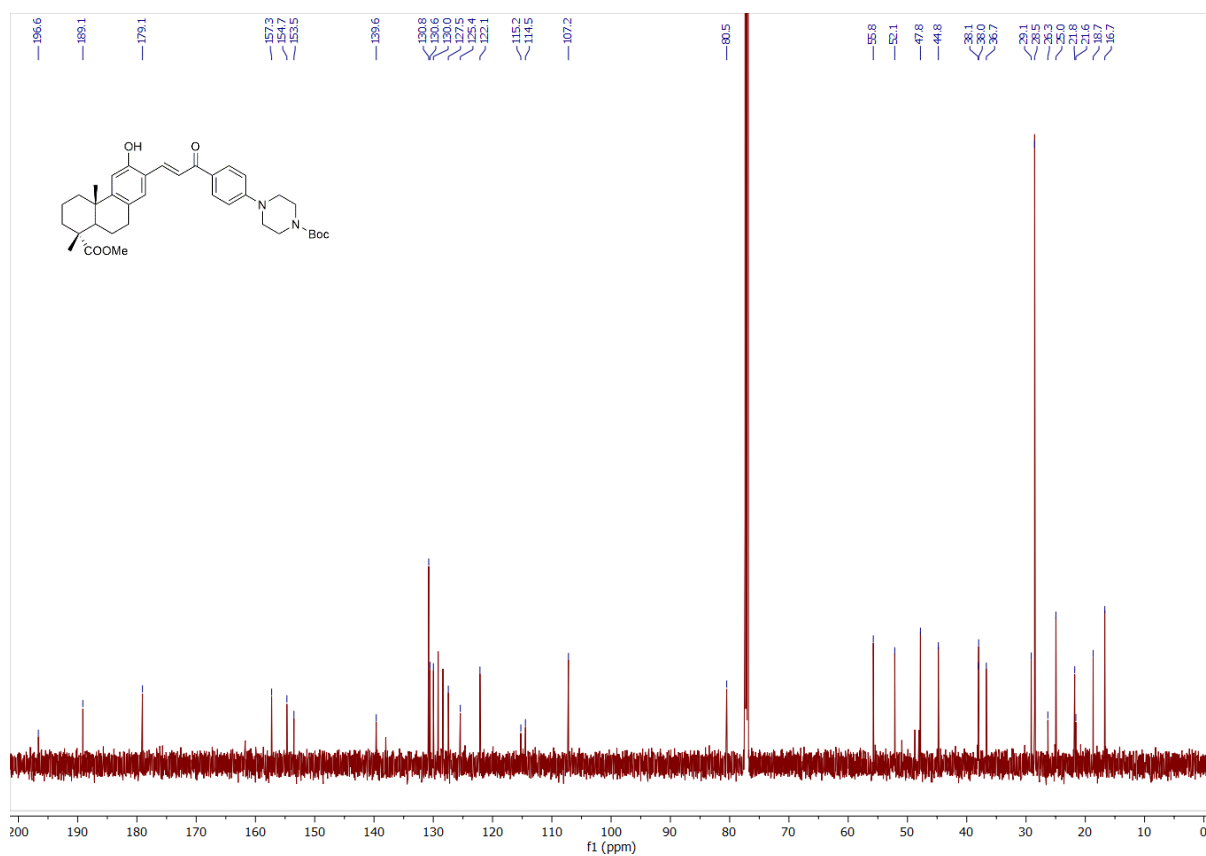

Figure S43. <sup>13</sup>C-NMR spectrum of compound 48.

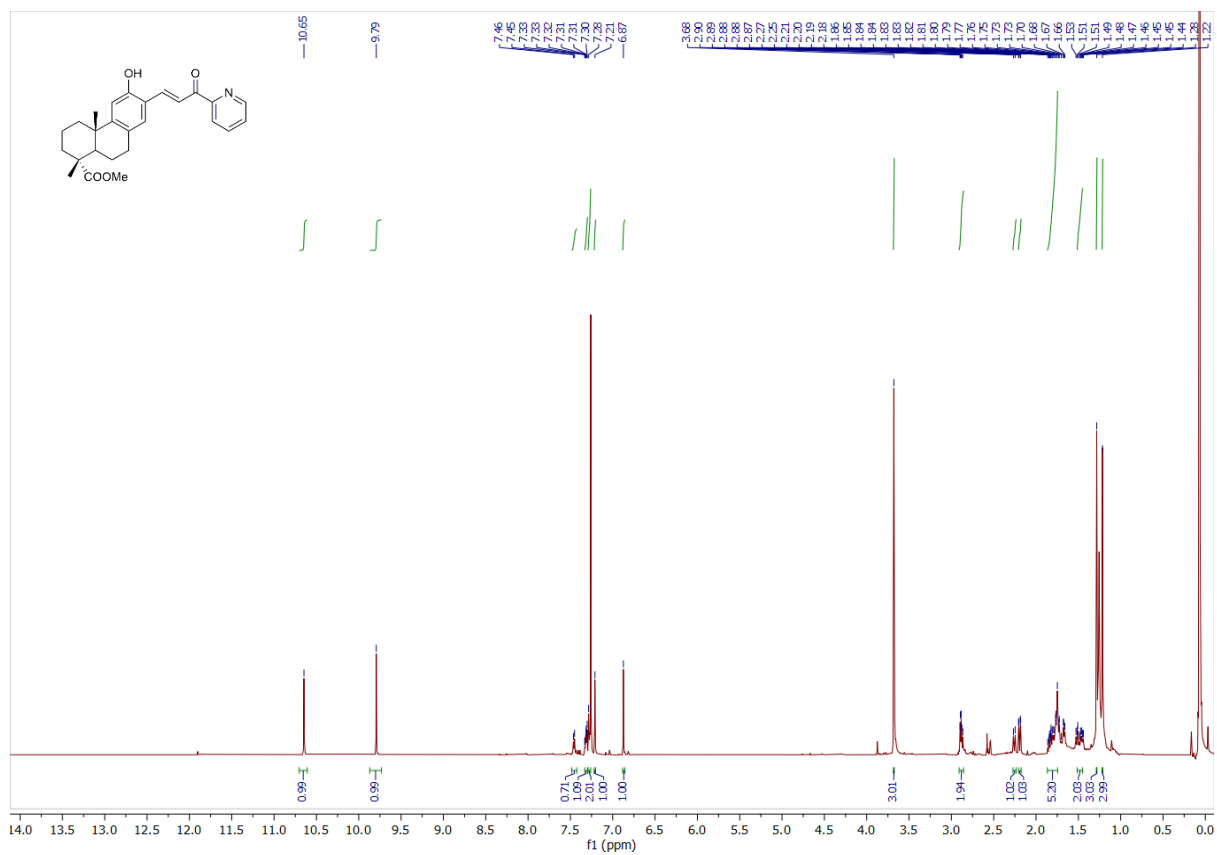

Figure S44. <sup>1</sup>H-NMR spectrum of compound 49.

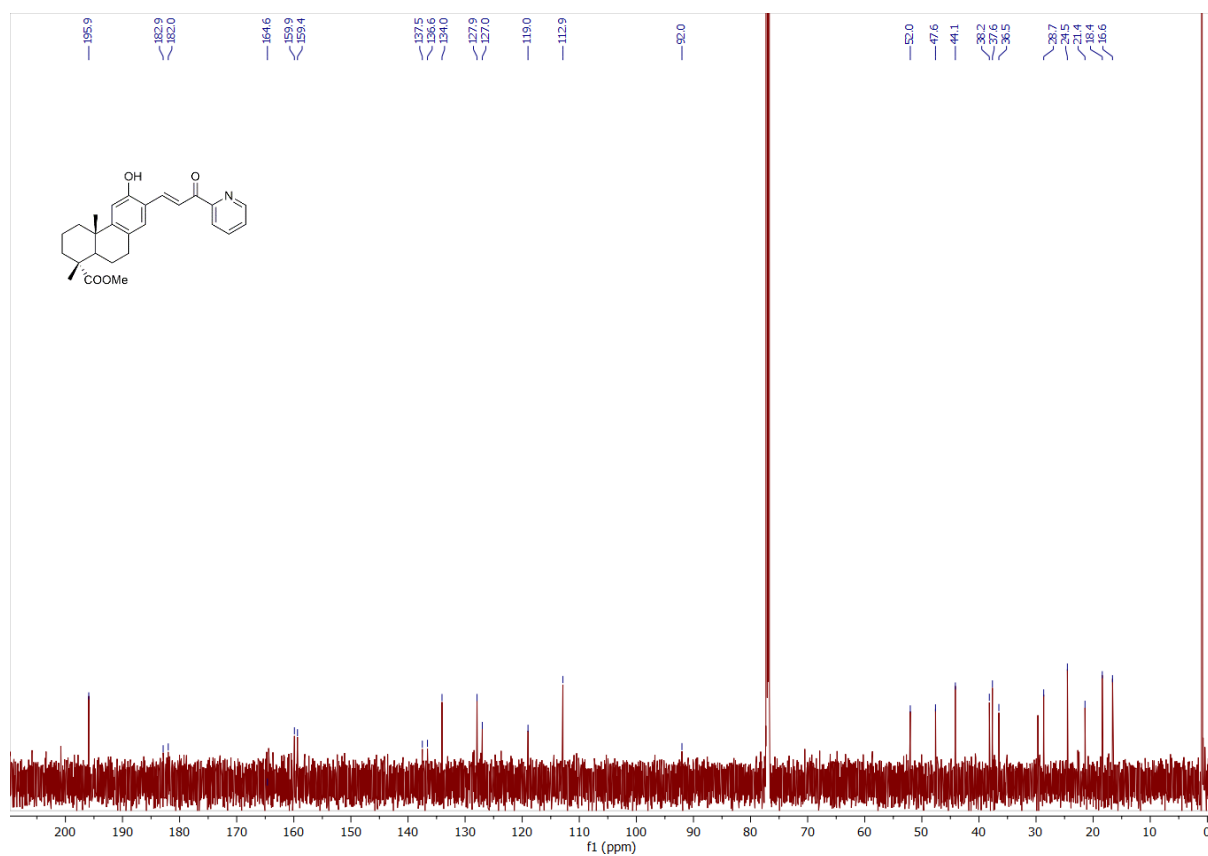

Figure S45. <sup>13</sup>C-NMR spectrum of compound 49.

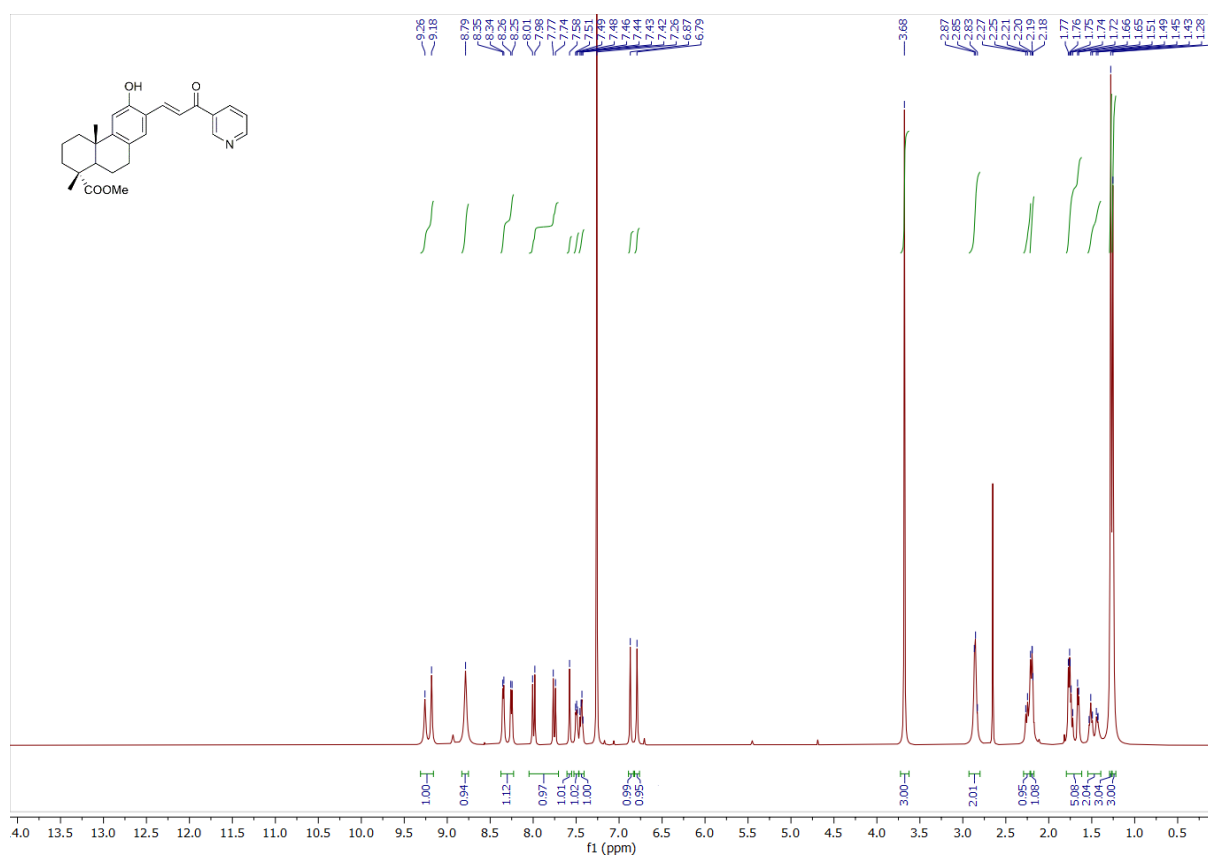

Figure S46. <sup>1</sup>H-NMR spectrum of compound 50.

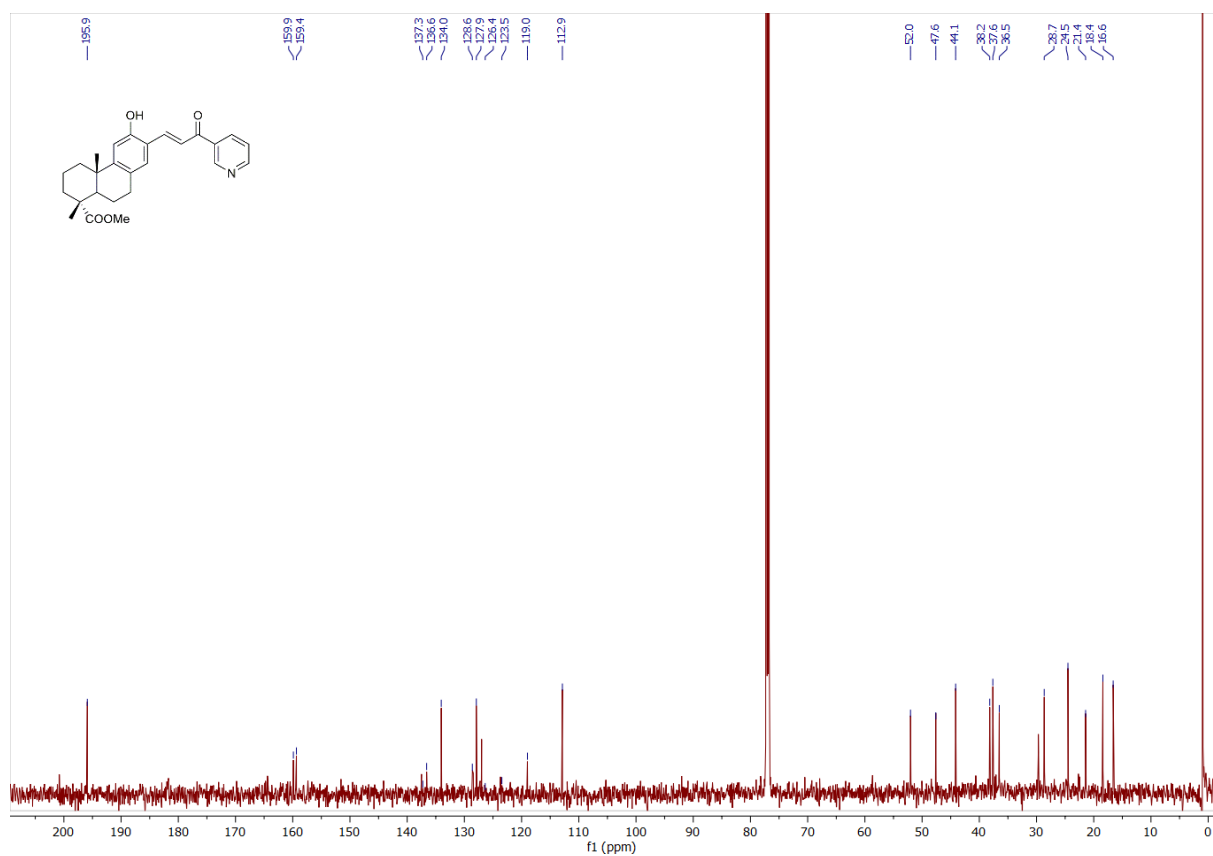

Figure S47. <sup>13</sup>C-NMR spectrum of compound 50.

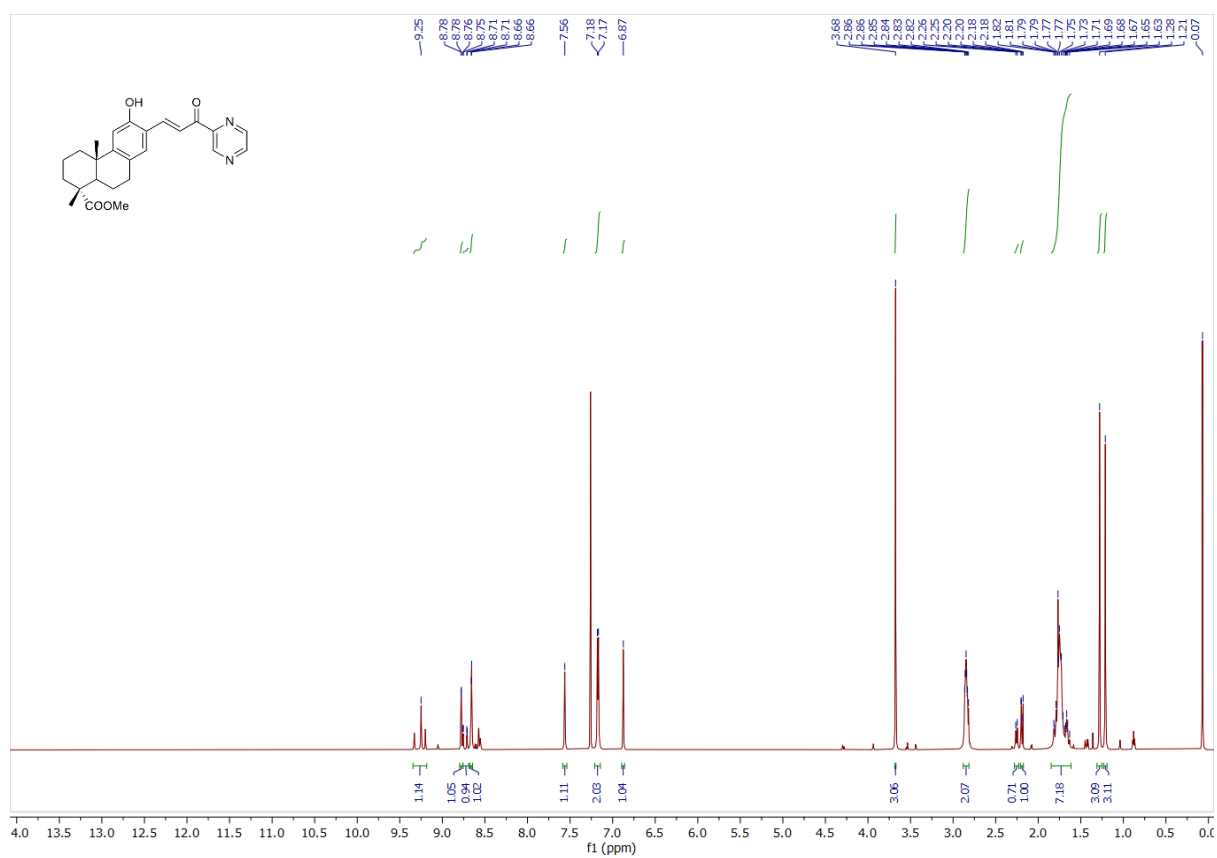

Figure S48. <sup>1</sup>H-NMR spectrum of compound 51.

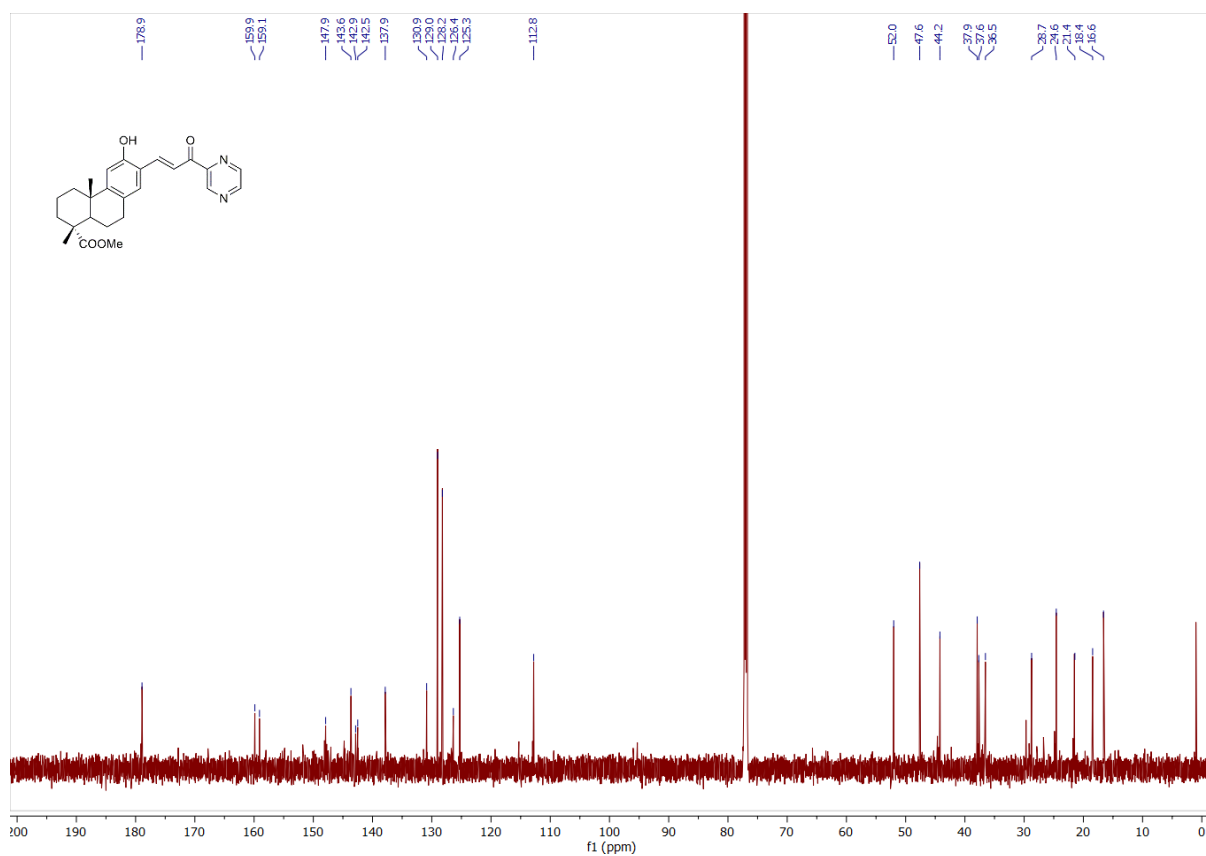

Figure S49. <sup>13</sup>C-NMR spectrum of compound 51.

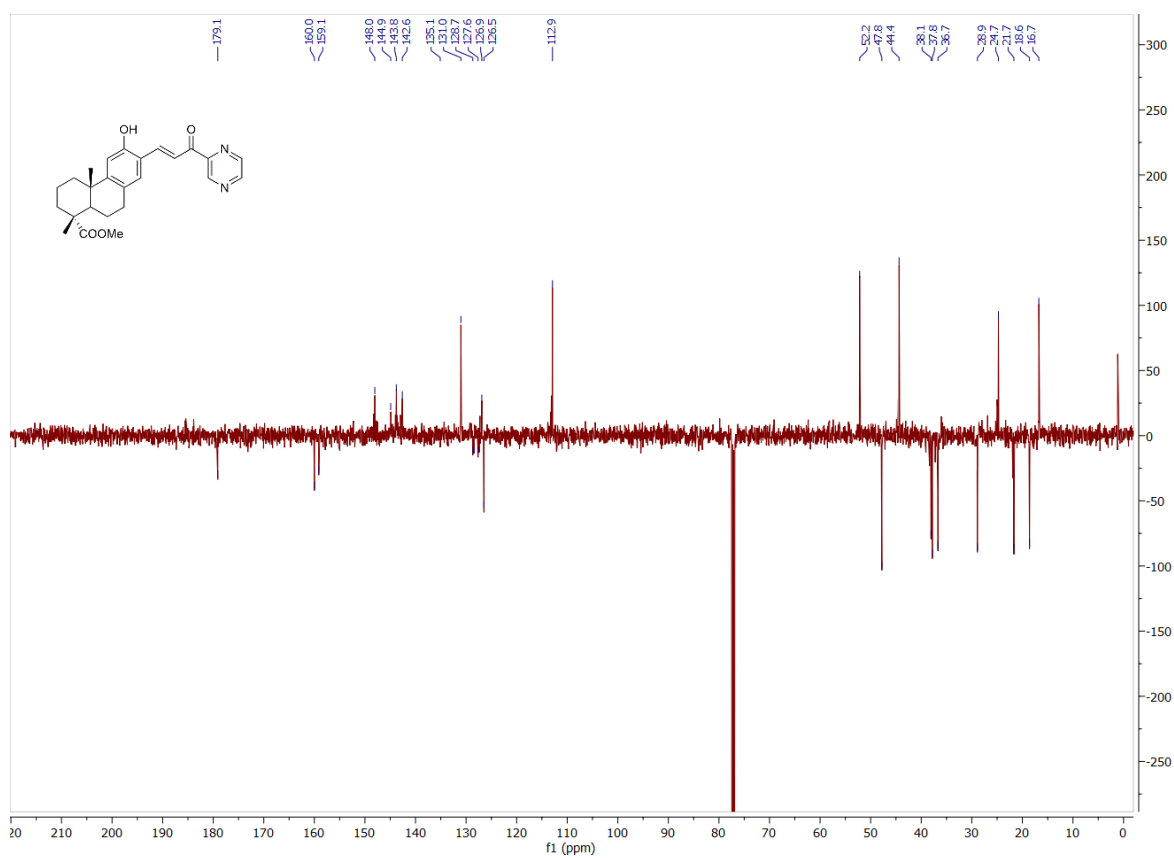

Figure S50. APT-NMR spectrum of compound 51.

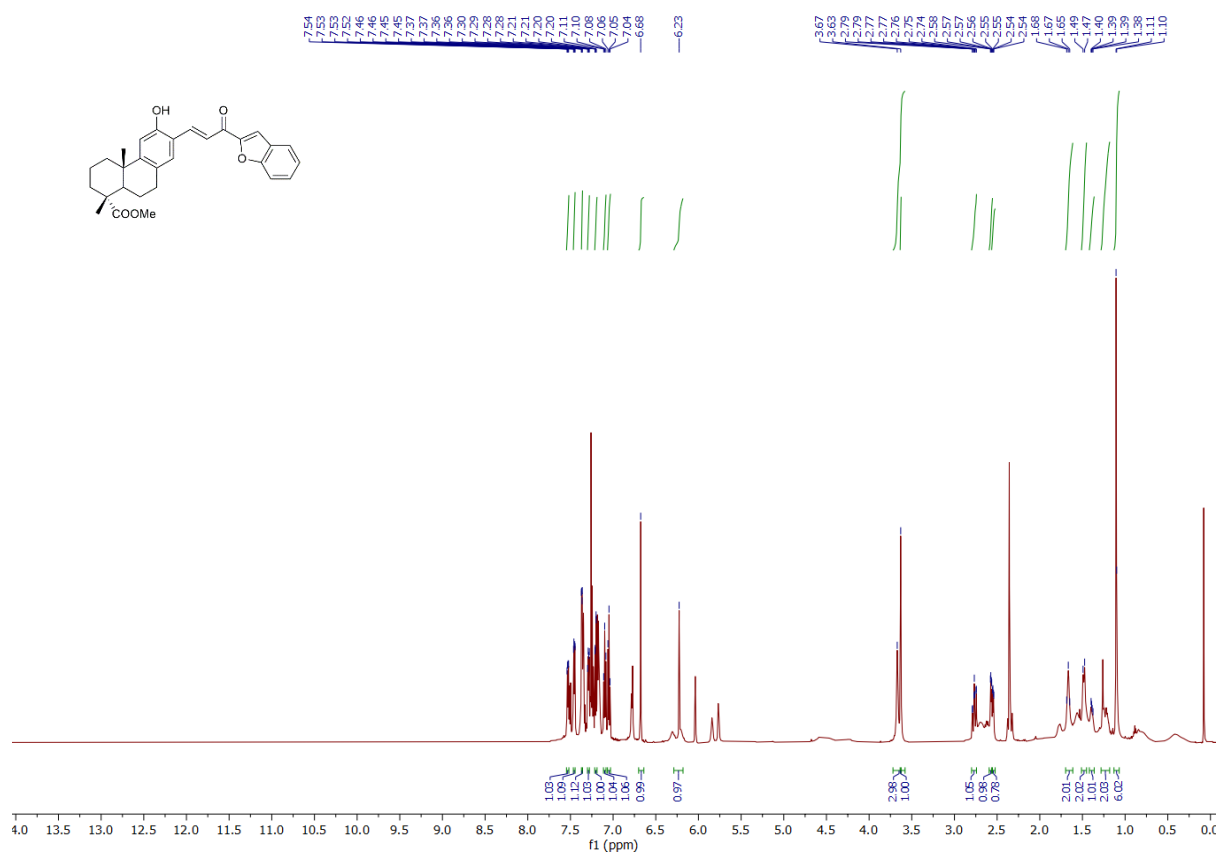

Figure S51 <sup>1</sup>H-NMR spectrum of compound 52.

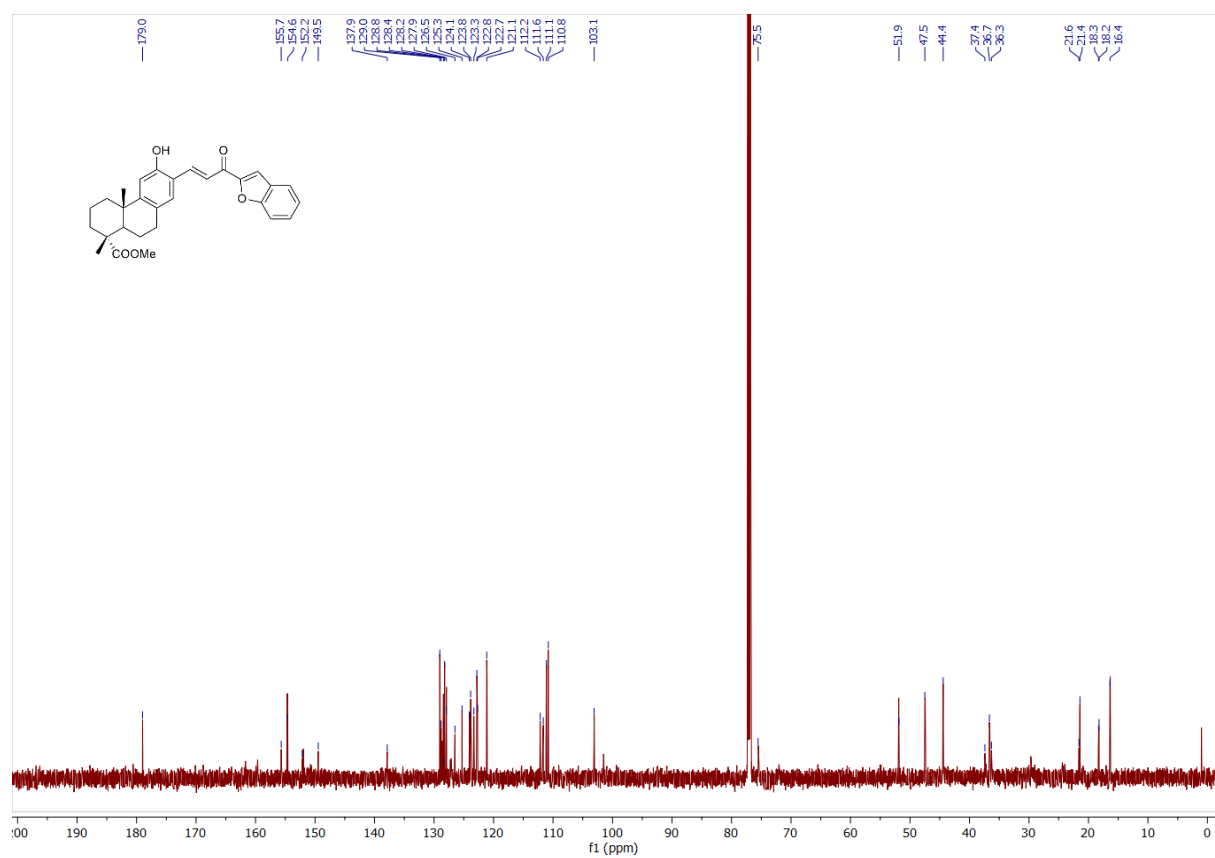

Figure S52. <sup>13</sup>C-NMR spectrum of compound 52.

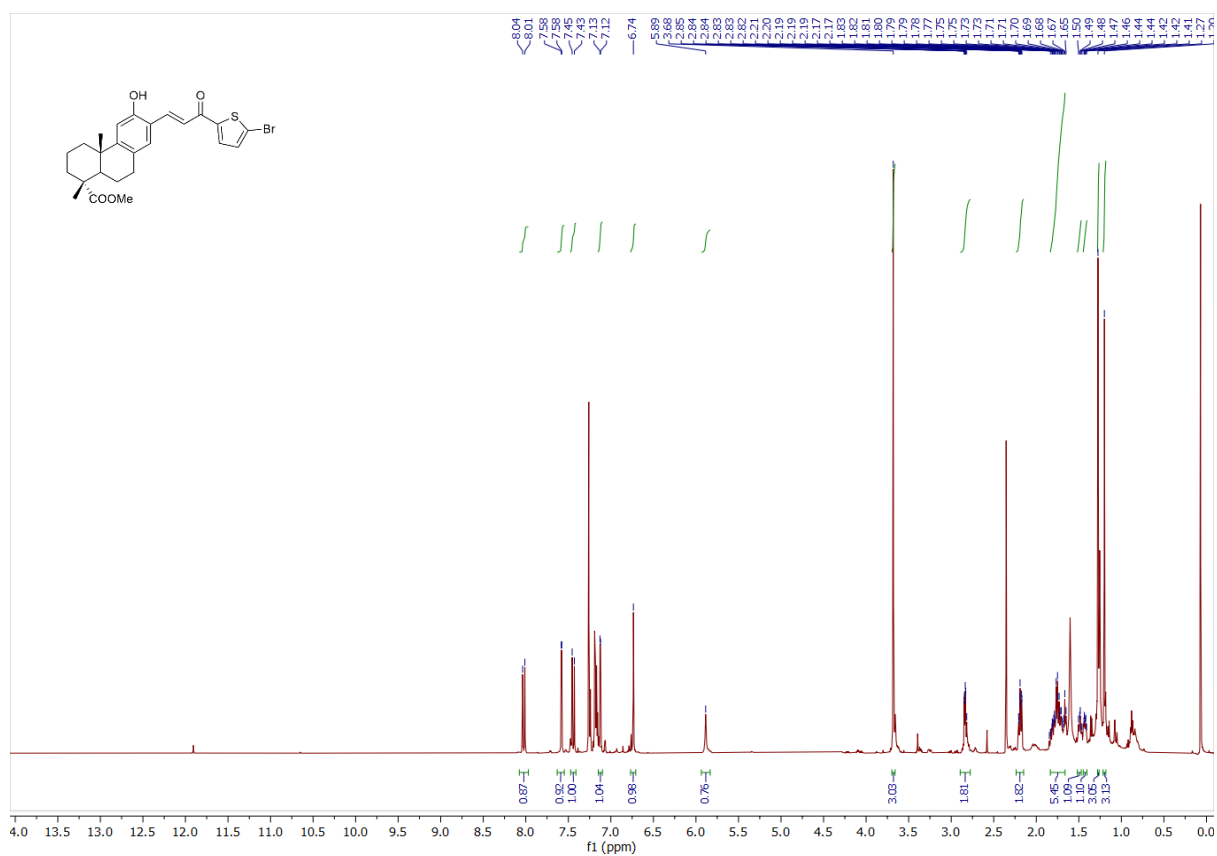

Figure S53. <sup>1</sup>H-NMR spectrum of compound 53.

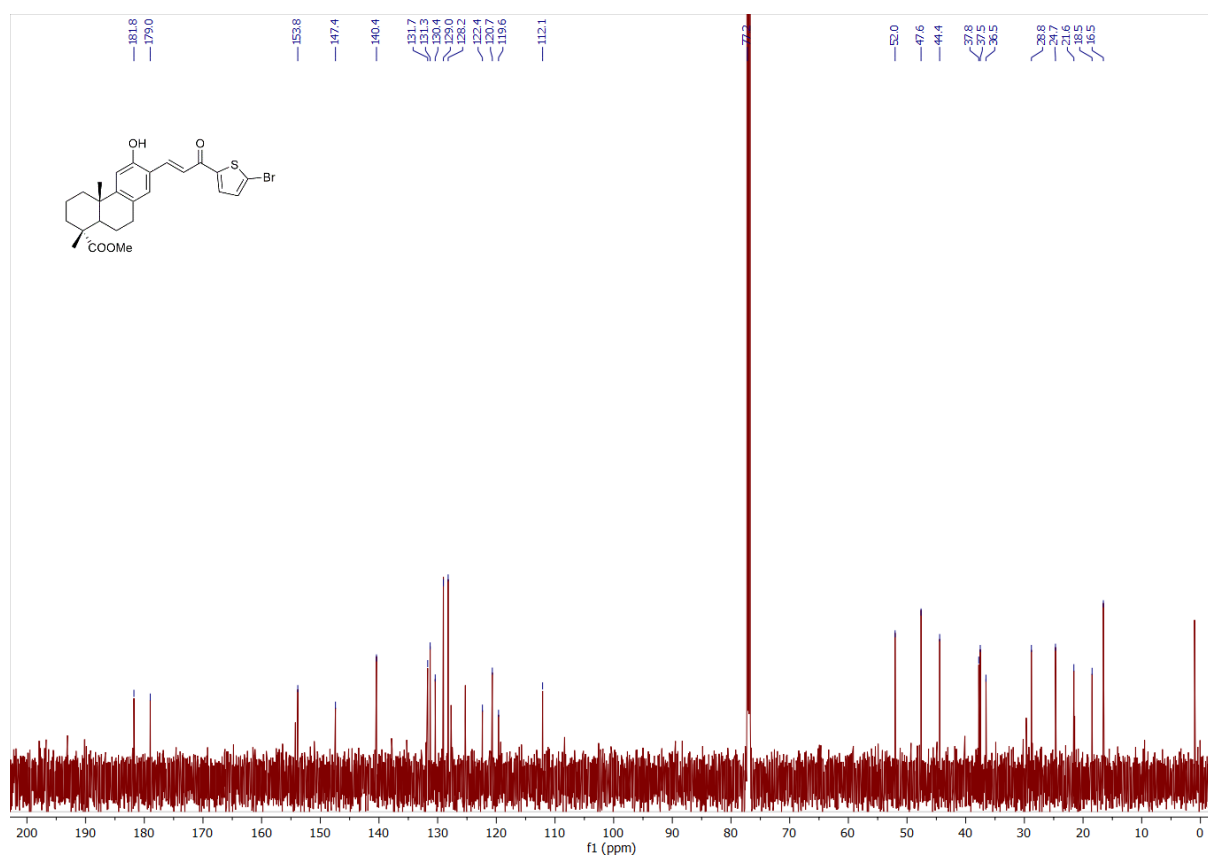

Figure S54. <sup>13</sup>C-NMR spectrum of compound 53.
